# Supplementary material for: Identification of ligands for E3 ligases with restricted expression using fragment-based methods
Source: Royal Society of Chemistry journal article supplement (doi:10.1039/d5cb00198f), 2025-01-01

**Supplemental Figure 1. Gene dependency of TRAF4 and CBLC by cancer lineage and transcript levels. (A)** Boxplots show distribution of CRISPR knockdown effect in cancer cells lines grouped by cancer lineage. **(B)** Scatterplots show genetic dependency relative transcript abundance (TPM) for TRAF4 and CBLC colored by cancer lineage.

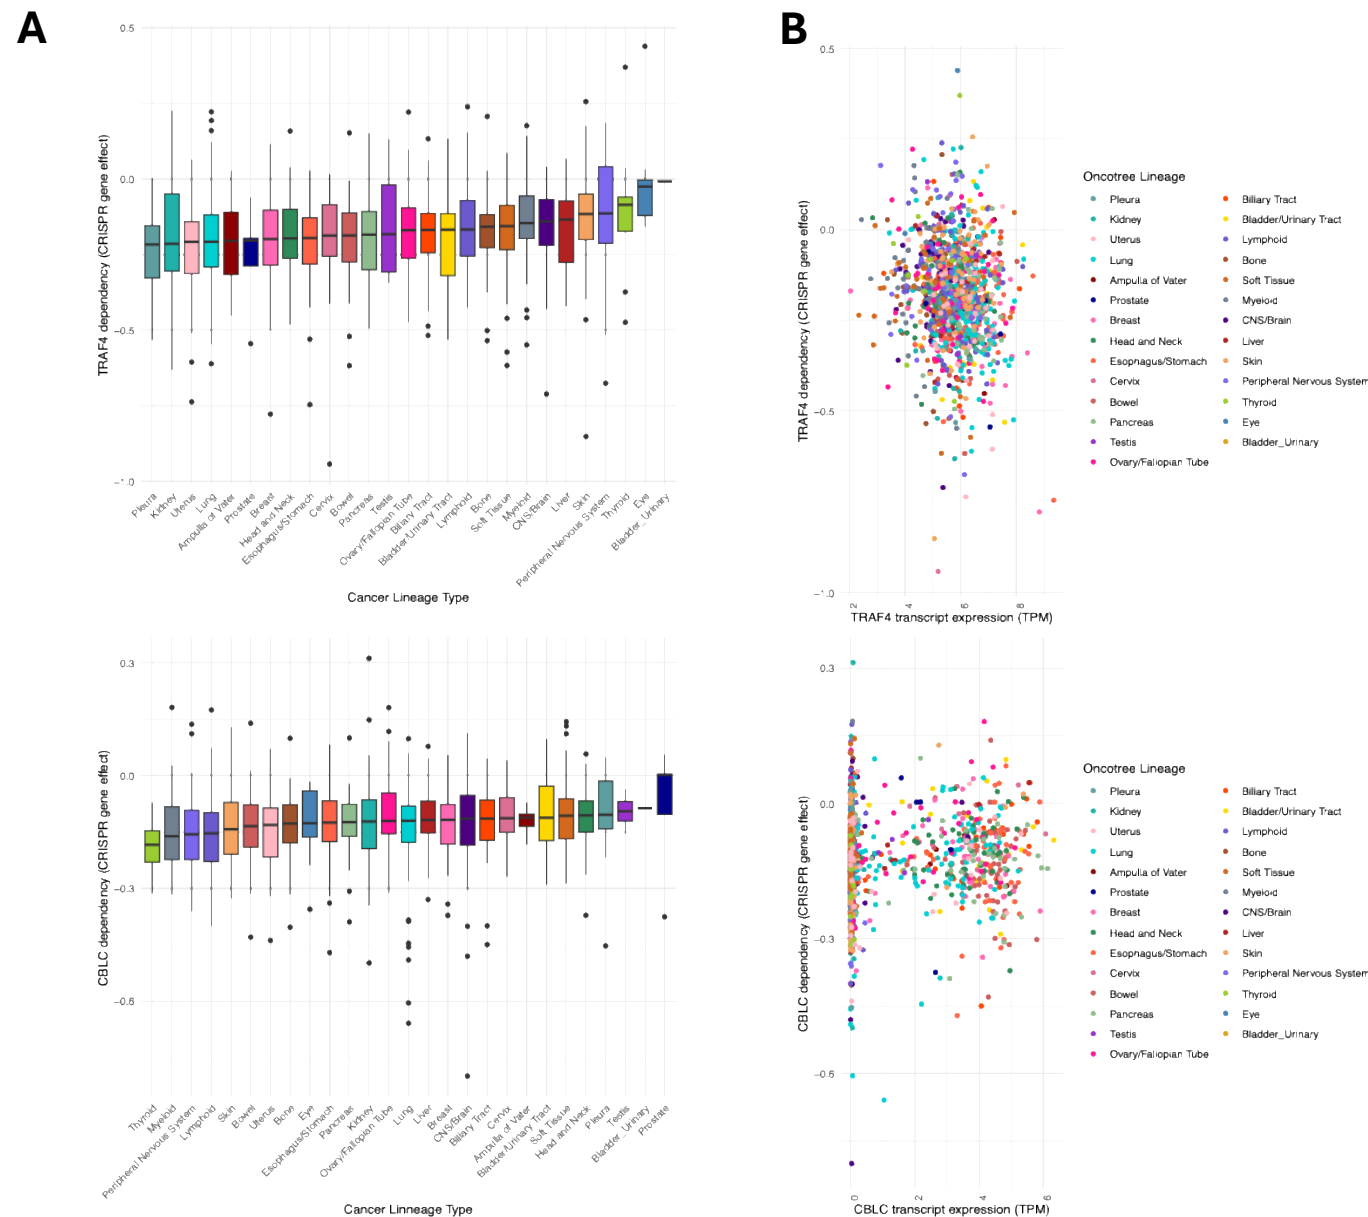

**Supplemental Figure 2. Expanded transcriptomics profile.** Violin plots show the expression of CBL-c (**A**) and TRAF-4 (**B**) stratified by tissue or tumor sample type.

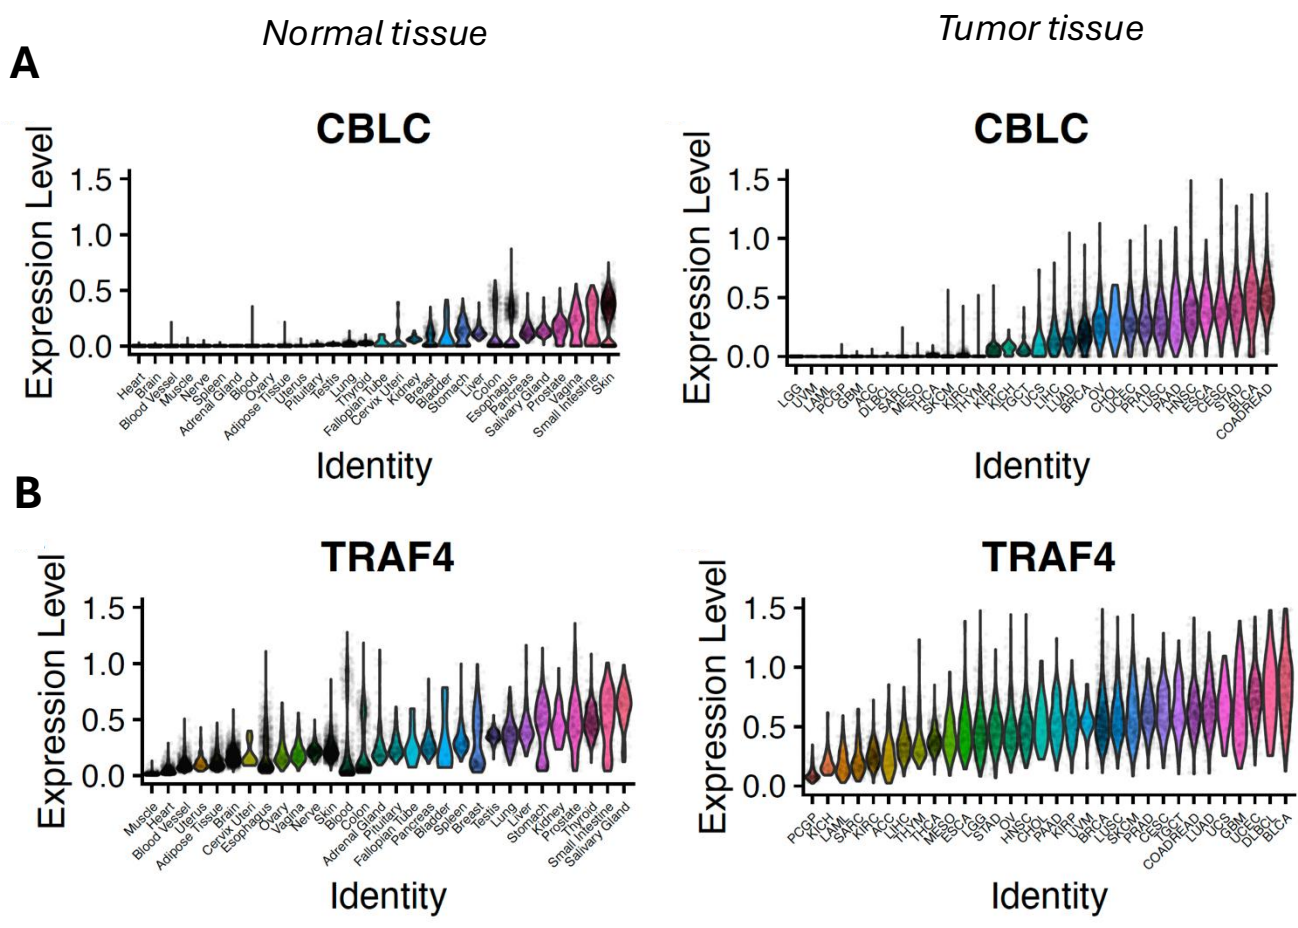

**Supplemental Figure 3. Unedited Western blots for Figure 3A blot 1.**  
Immunoblot shows CBL-c protein levels across tumor specimens and cell lines.

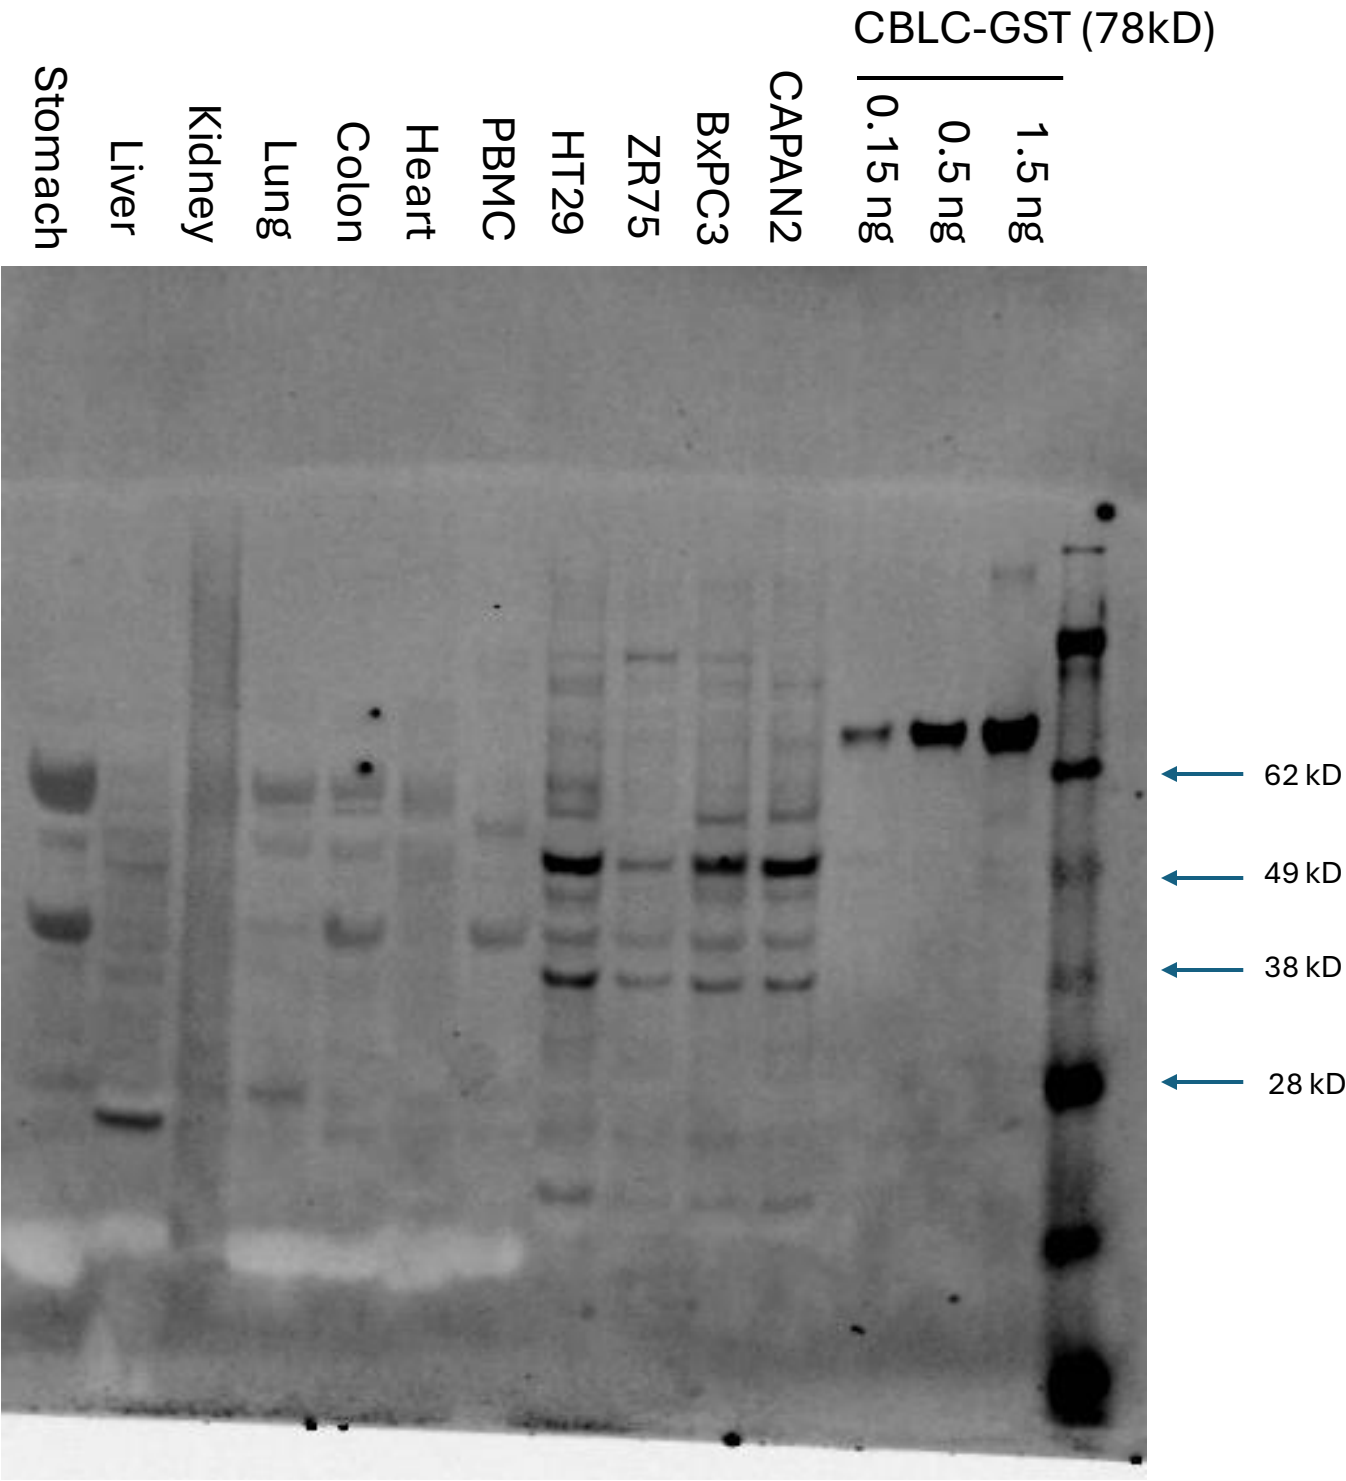

**Supplemental Figure 4. Unedited Western blots for Figure 3A blot 1.**  
Immunoblot shows GADH protein levels across tumor specimens and cell lines.

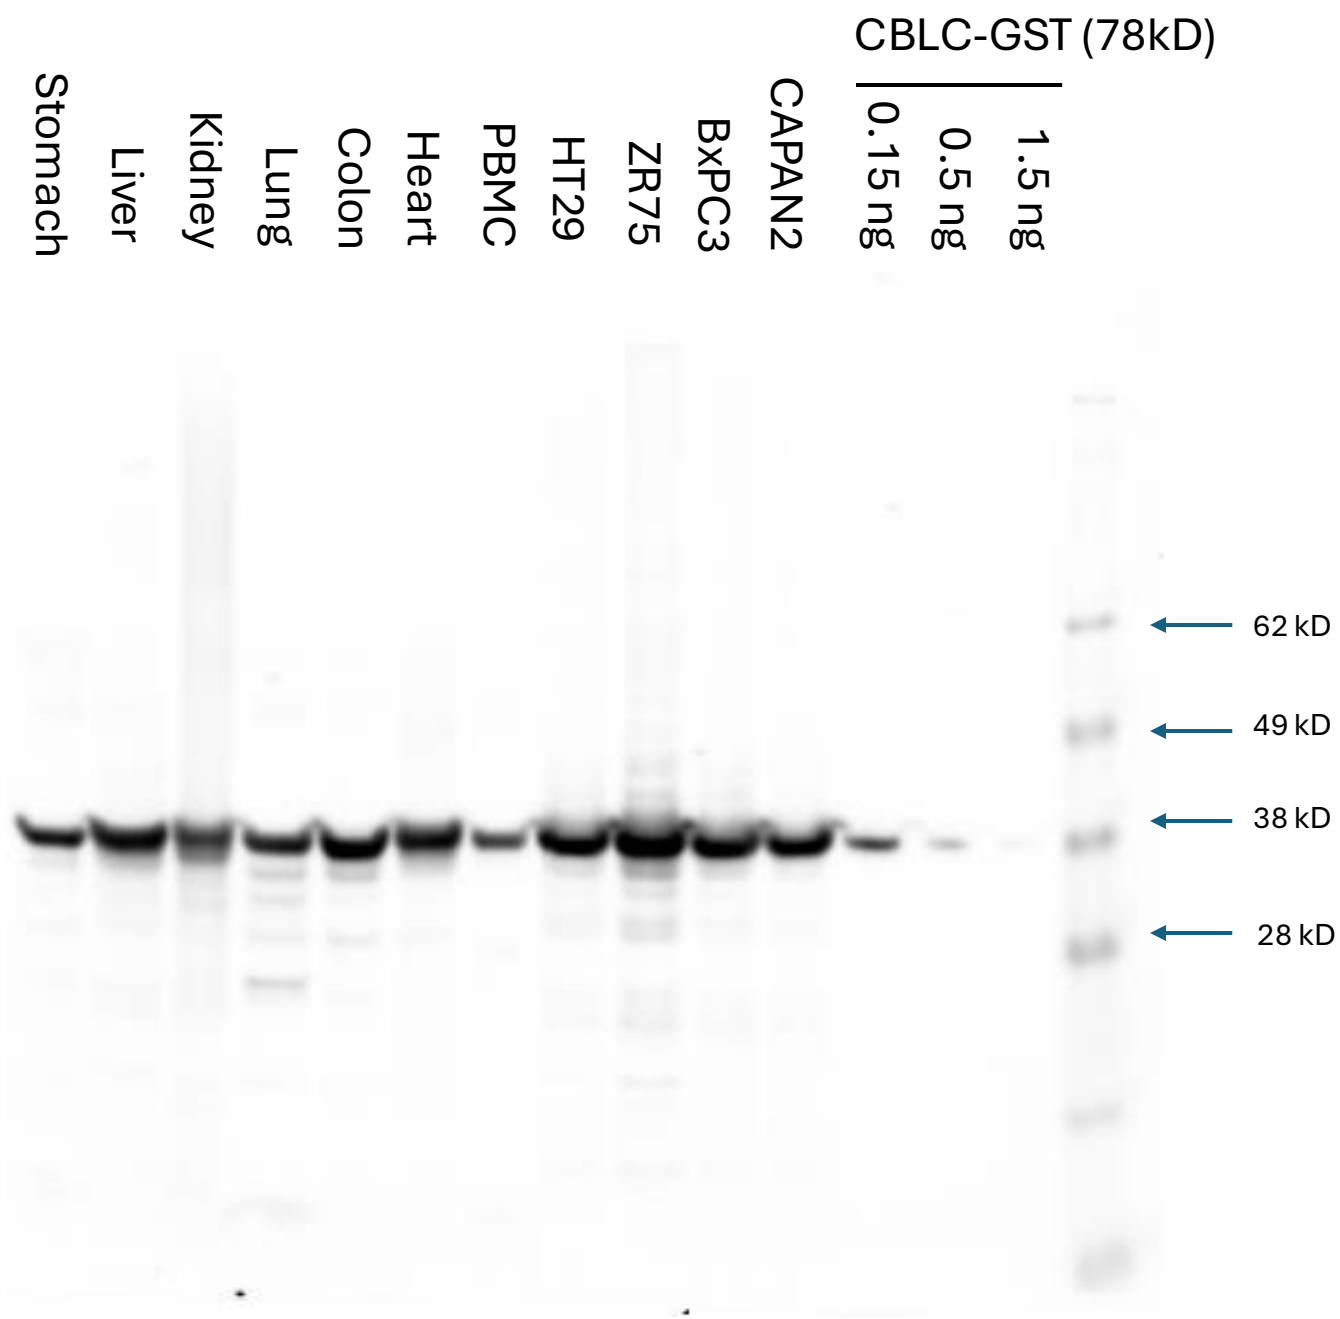

**Supplemental Figure 5. Unedited Western blots for Figure 3A blot 2.**  
Immunoblot shows CBL-c protein levels across tumor specimens and cell lines.

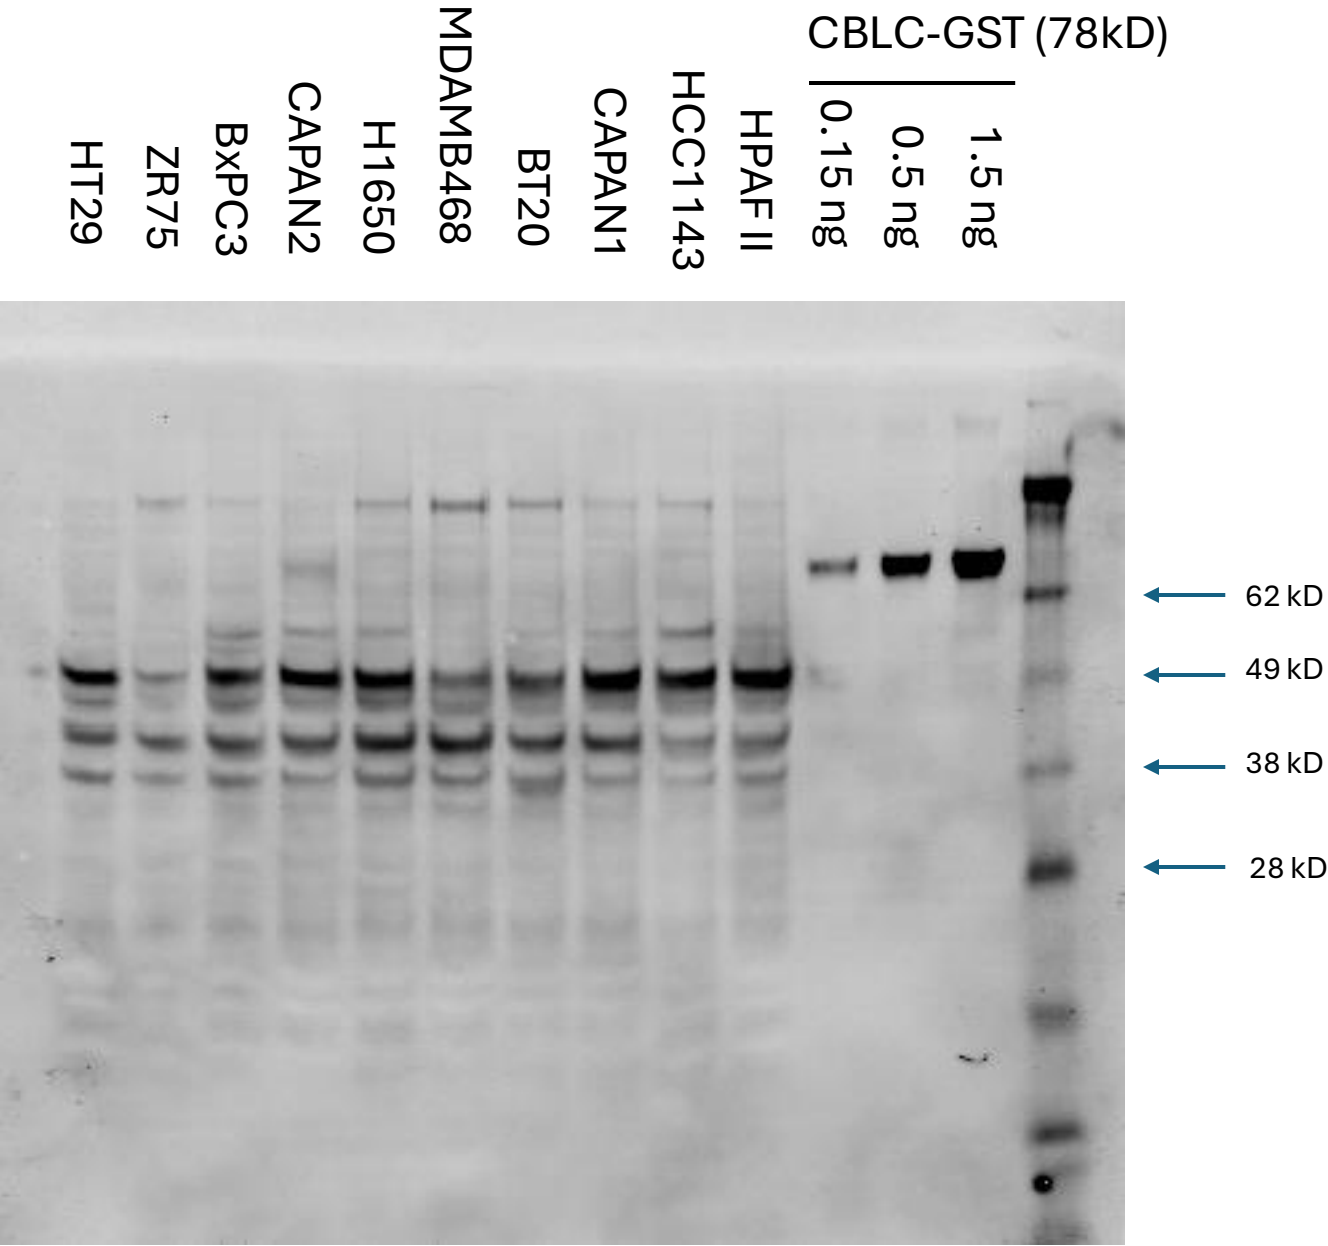

**Supplemental Figure 6. Unedited Western blots for Figure 3A blot 2.**  
Immunoblot shows GAPDH protein levels across tumor specimens and cell lines.

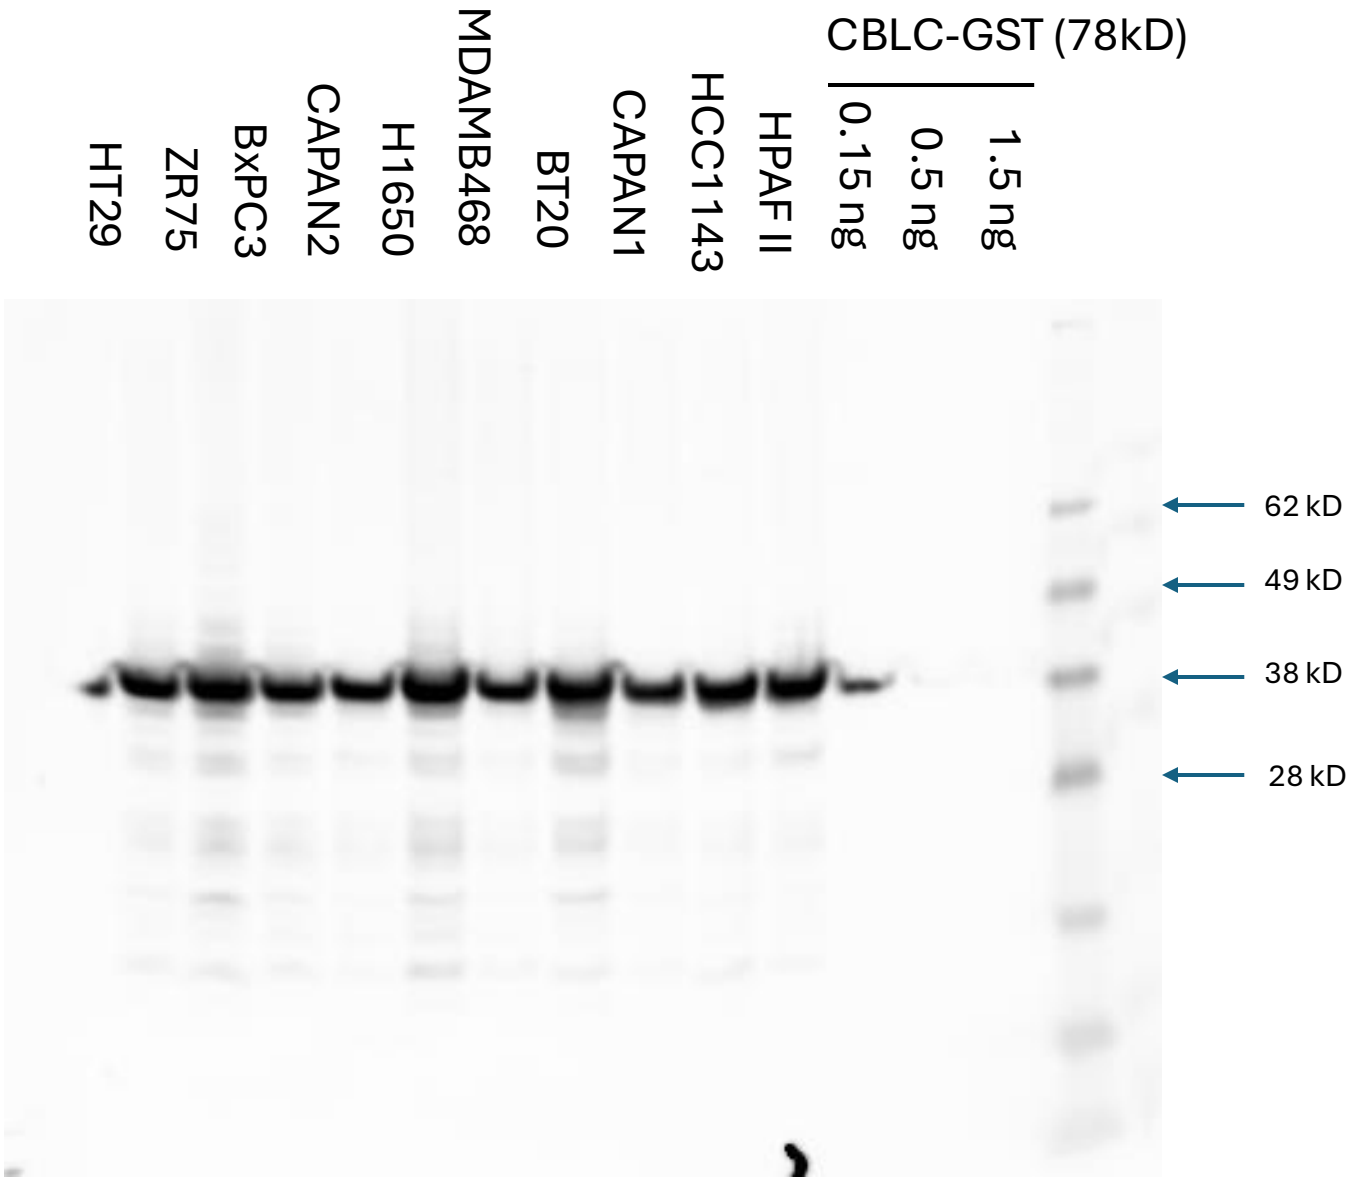

**Supplemental Figure 7. Unedited Western blots for Figure 3B.** Immunoblot shows CBL-c protein levels across heart tissue samples or in HT29 cells transfected with control or siRNAs targeting CBL-c or unrelated protein KLHL12.

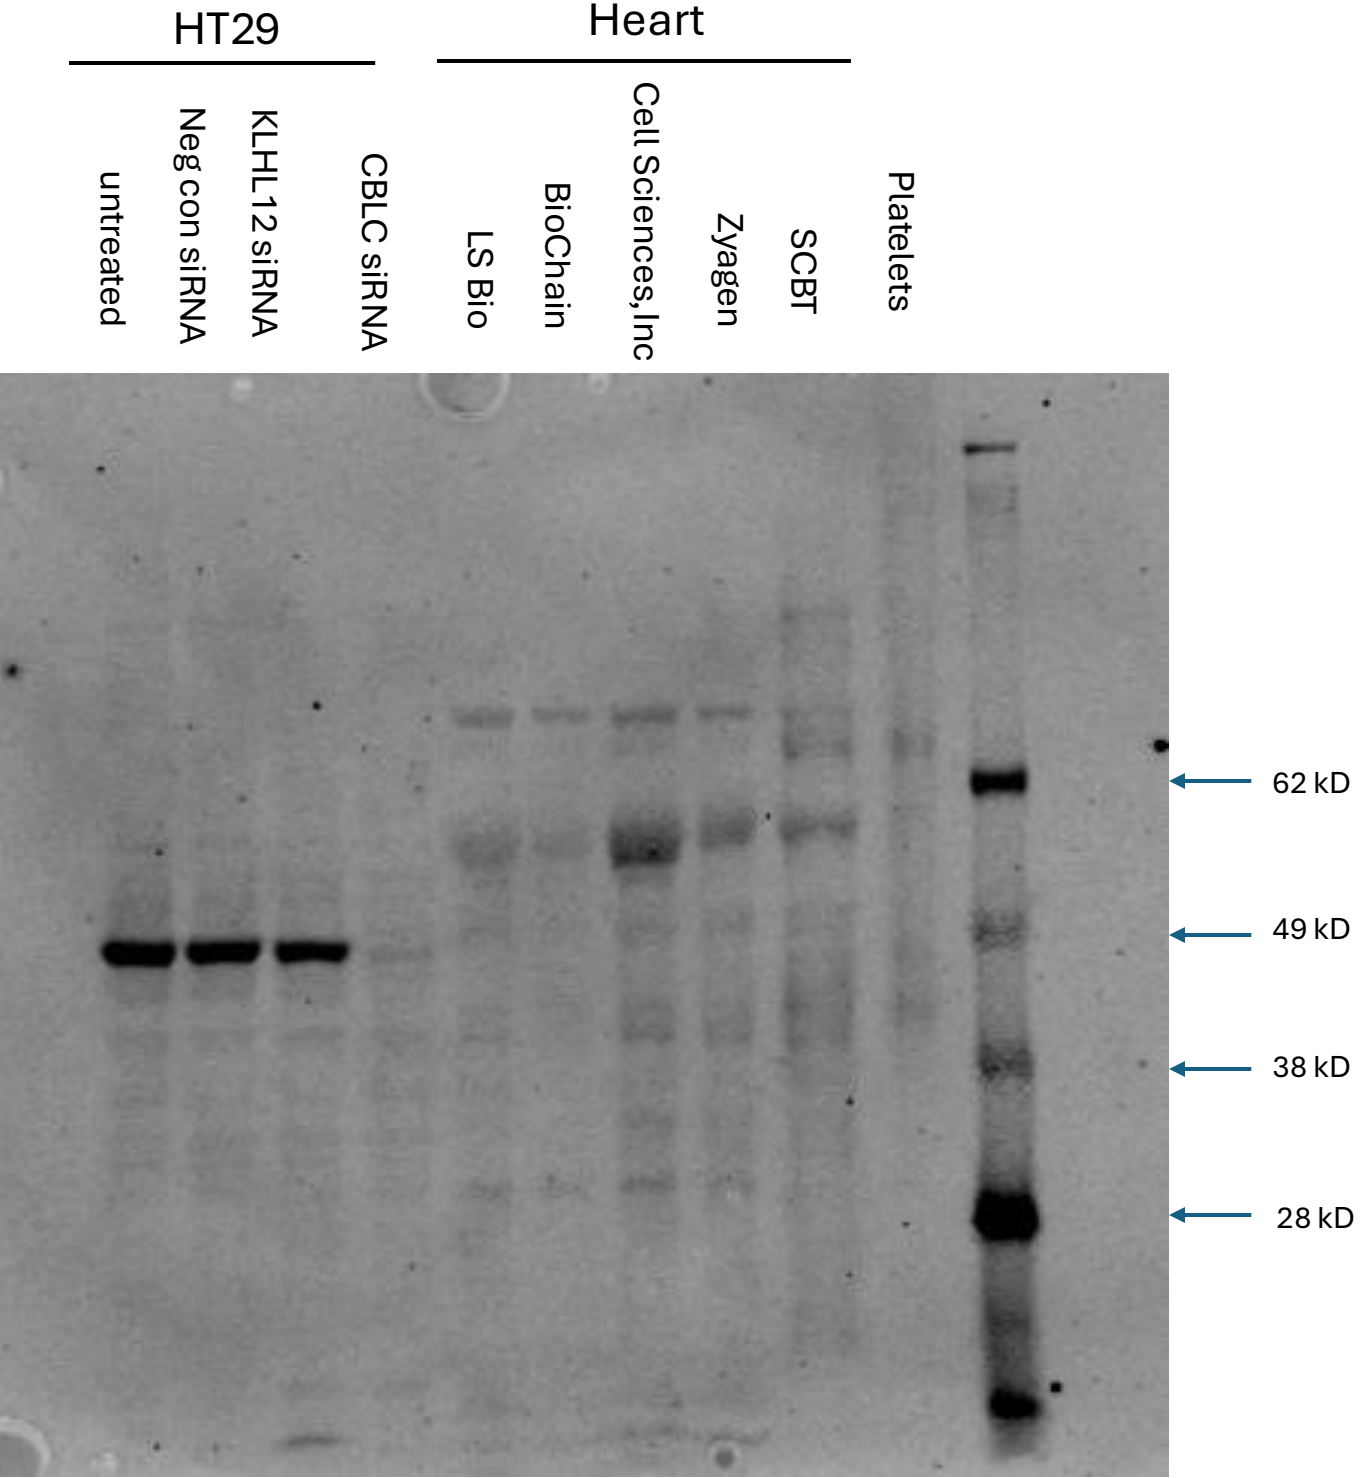

**Supplemental Figure 8. Unedited Western blots for Figure 3B, converted to black and white for publication.** Immunoblot shows GAPDH protein levels across heart tissue samples or in HT29 cells transfected with control or siRNAs targeting CBL-c or unrelated protein KLHL12.

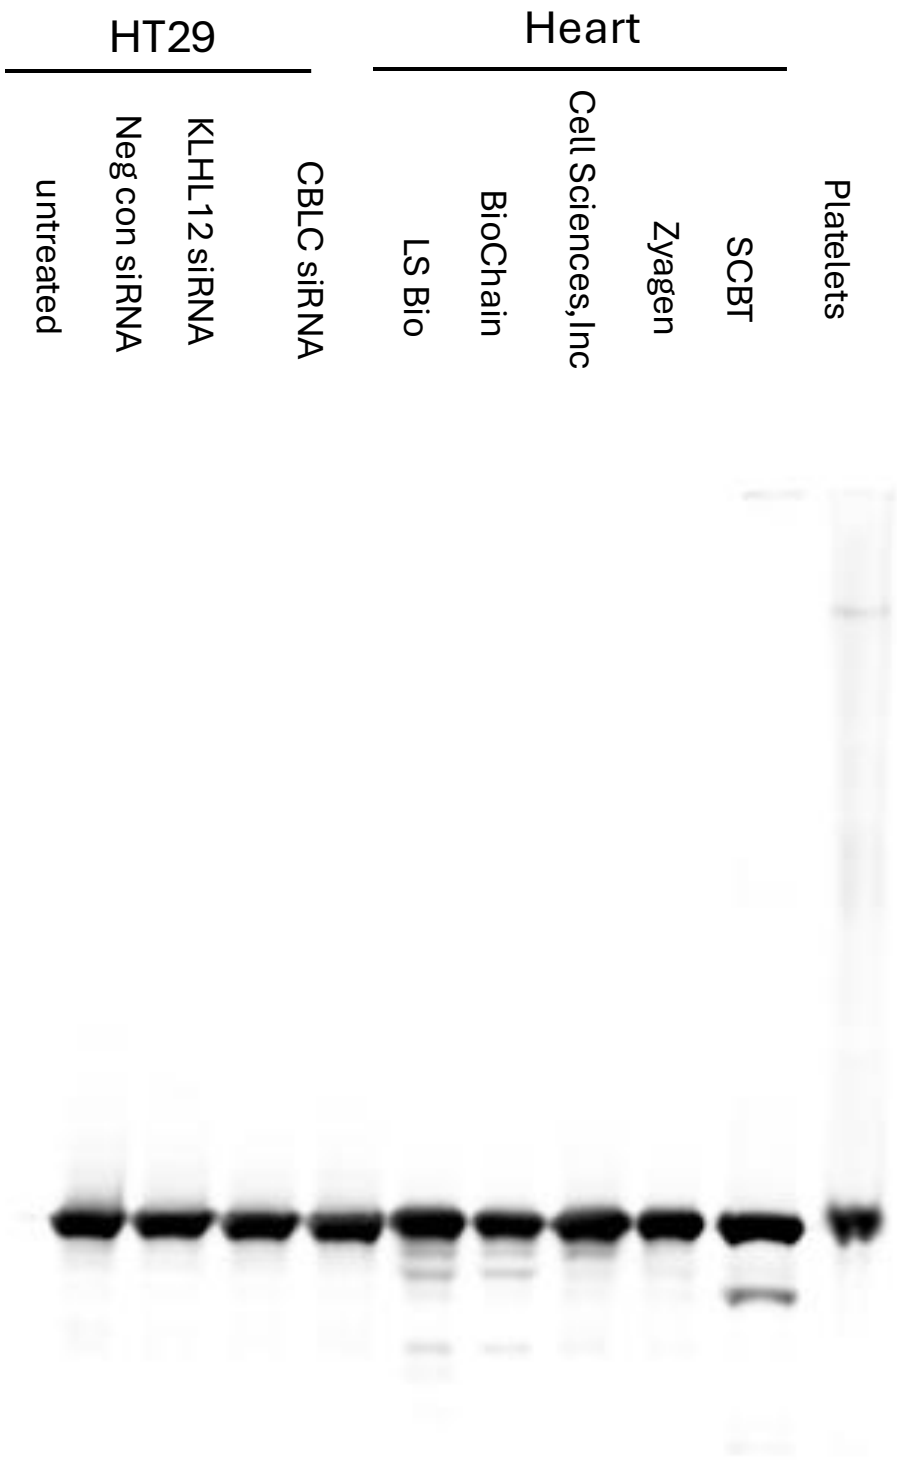



**Supplemental Figure 9. Unedited Western blots for Figure 3B, original two-color image from the LiCOR to better illustrate molecular weight markers.** Immunoblot shows GAPDH protein levels (green) across heart tissue samples or in HT29 cells transfected with control or siRNAs targeting CBL-c or unrelated protein KLHL12.

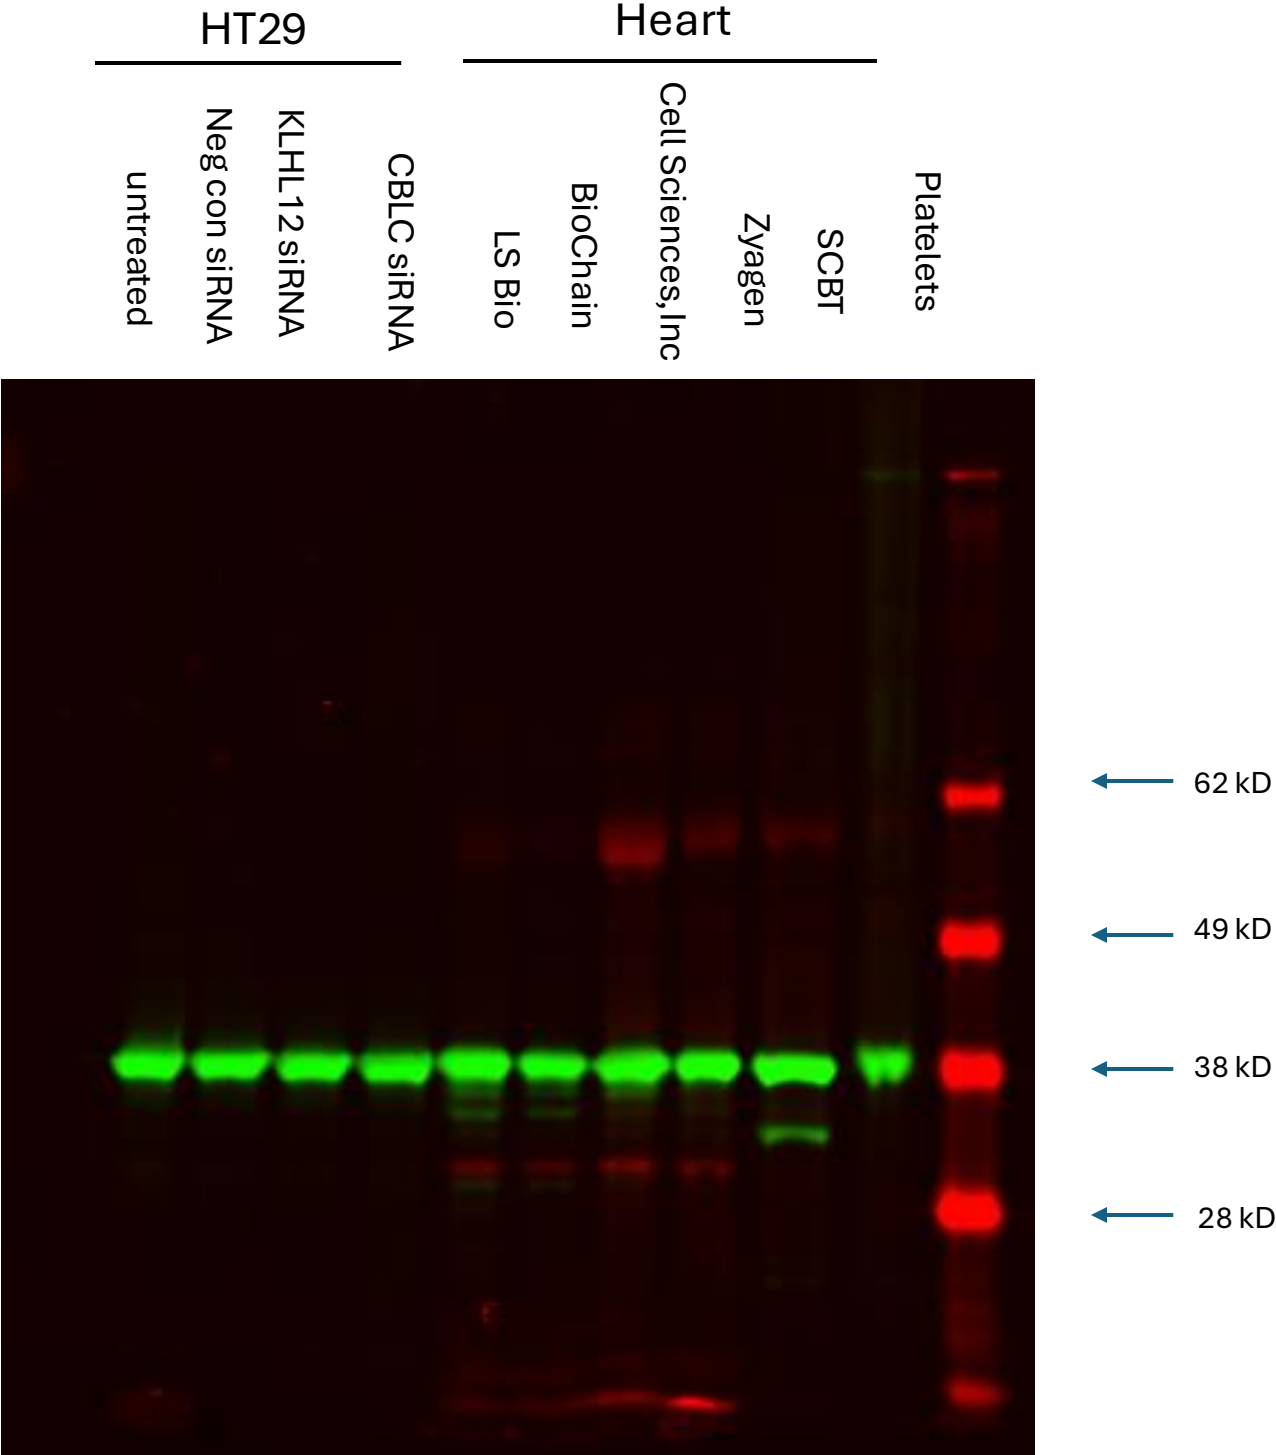

**Supplemental Figure 10. Unedited Western blots for Figure 7A.** Immunoblot shows TRAF-4 protein levels across tumor specimens and cell lines.

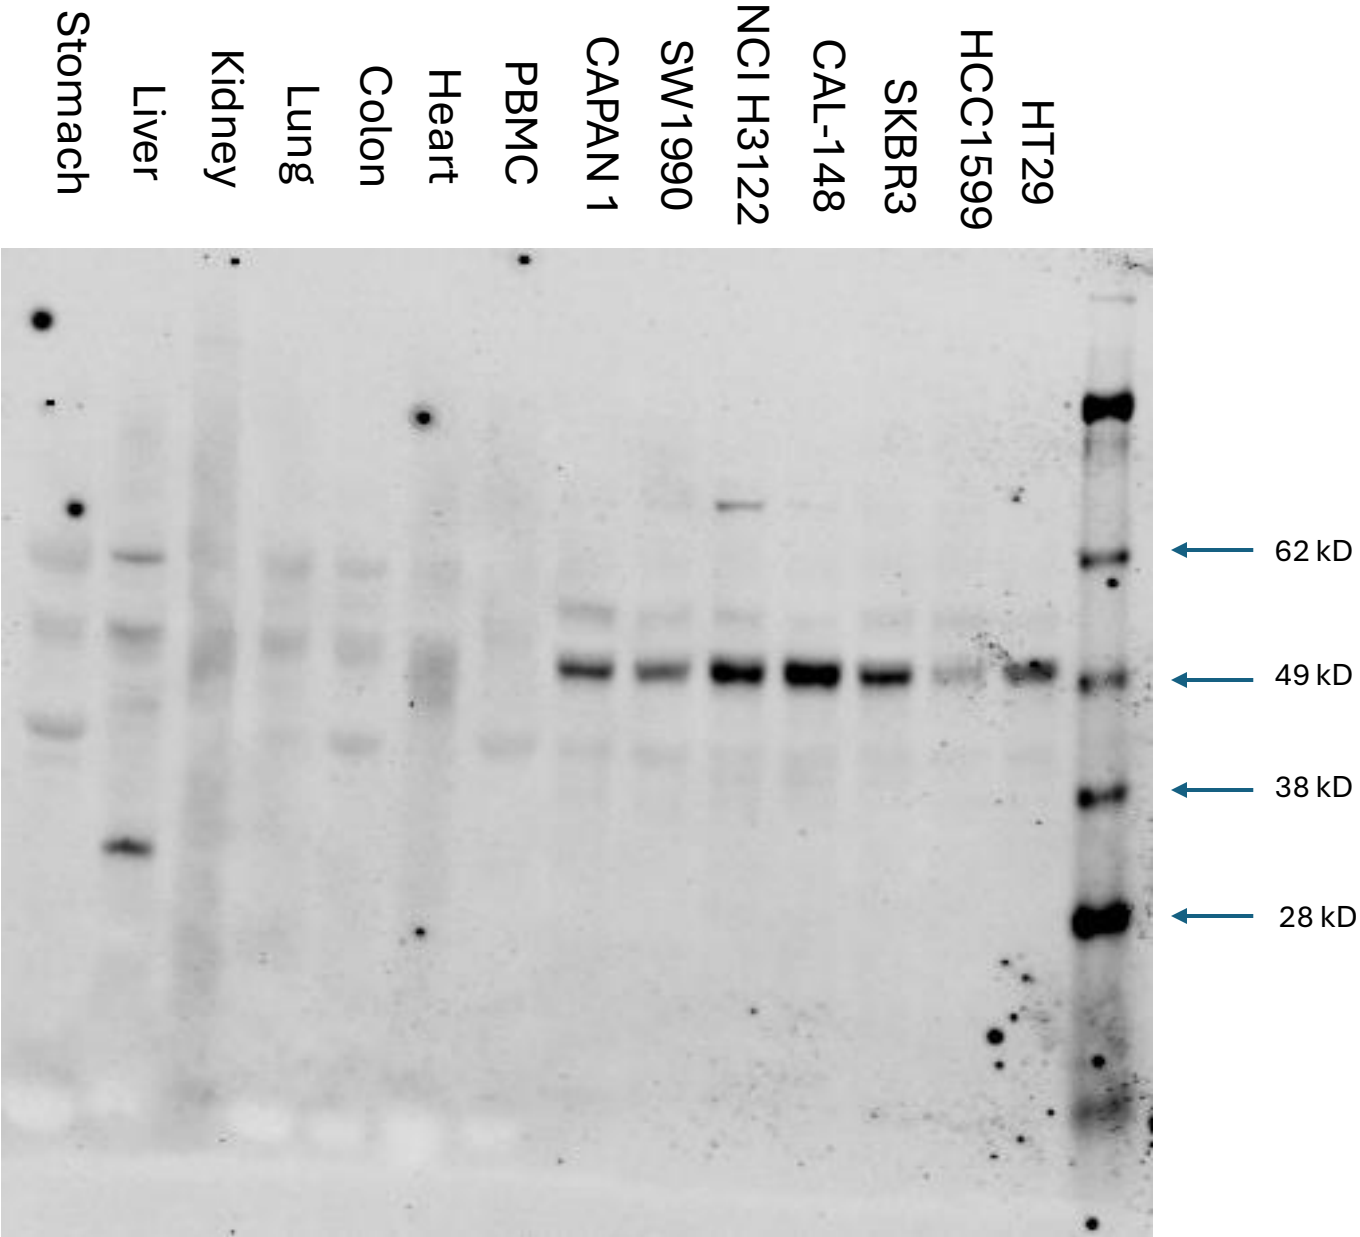

**Supplemental Figure 11. Unedited Western blots for Figure 7A, converted to black and white for publication.** Immunoblot shows GAPDH protein levels across tumor specimens and cell lines.

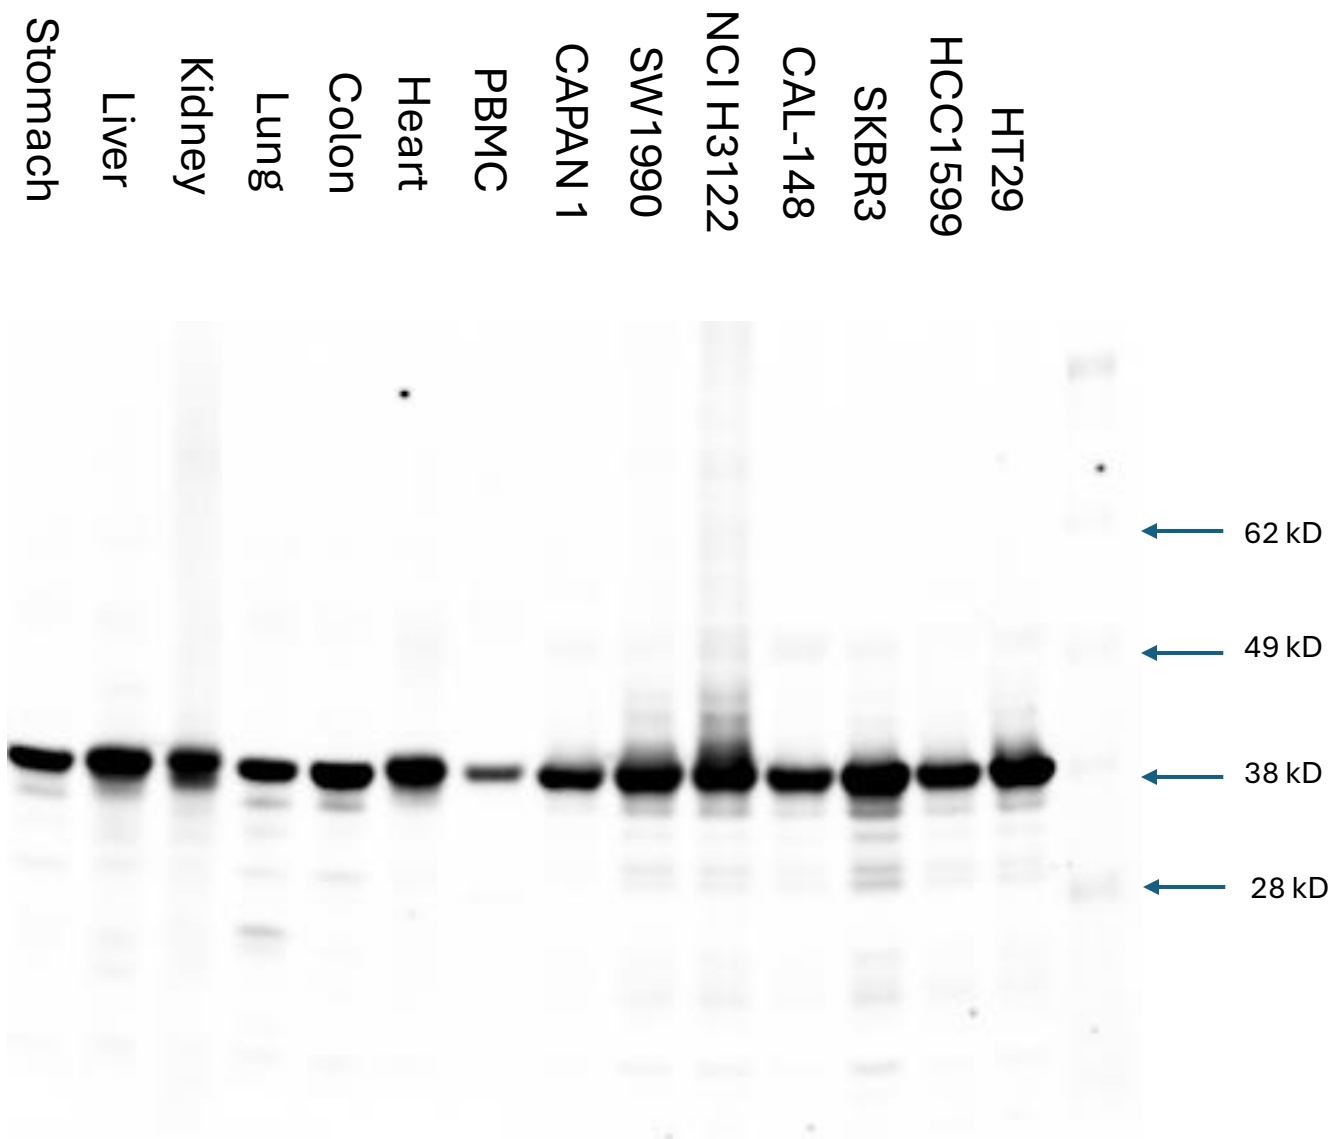

**Supplemental Figure 12. Unedited Western blots for Figure 7A, original two-color image from the LiCOR to better illustrate molecular weight markers.**  
Immunoblot shows GAPDH protein levels (green) across tumor specimens and cell lines.

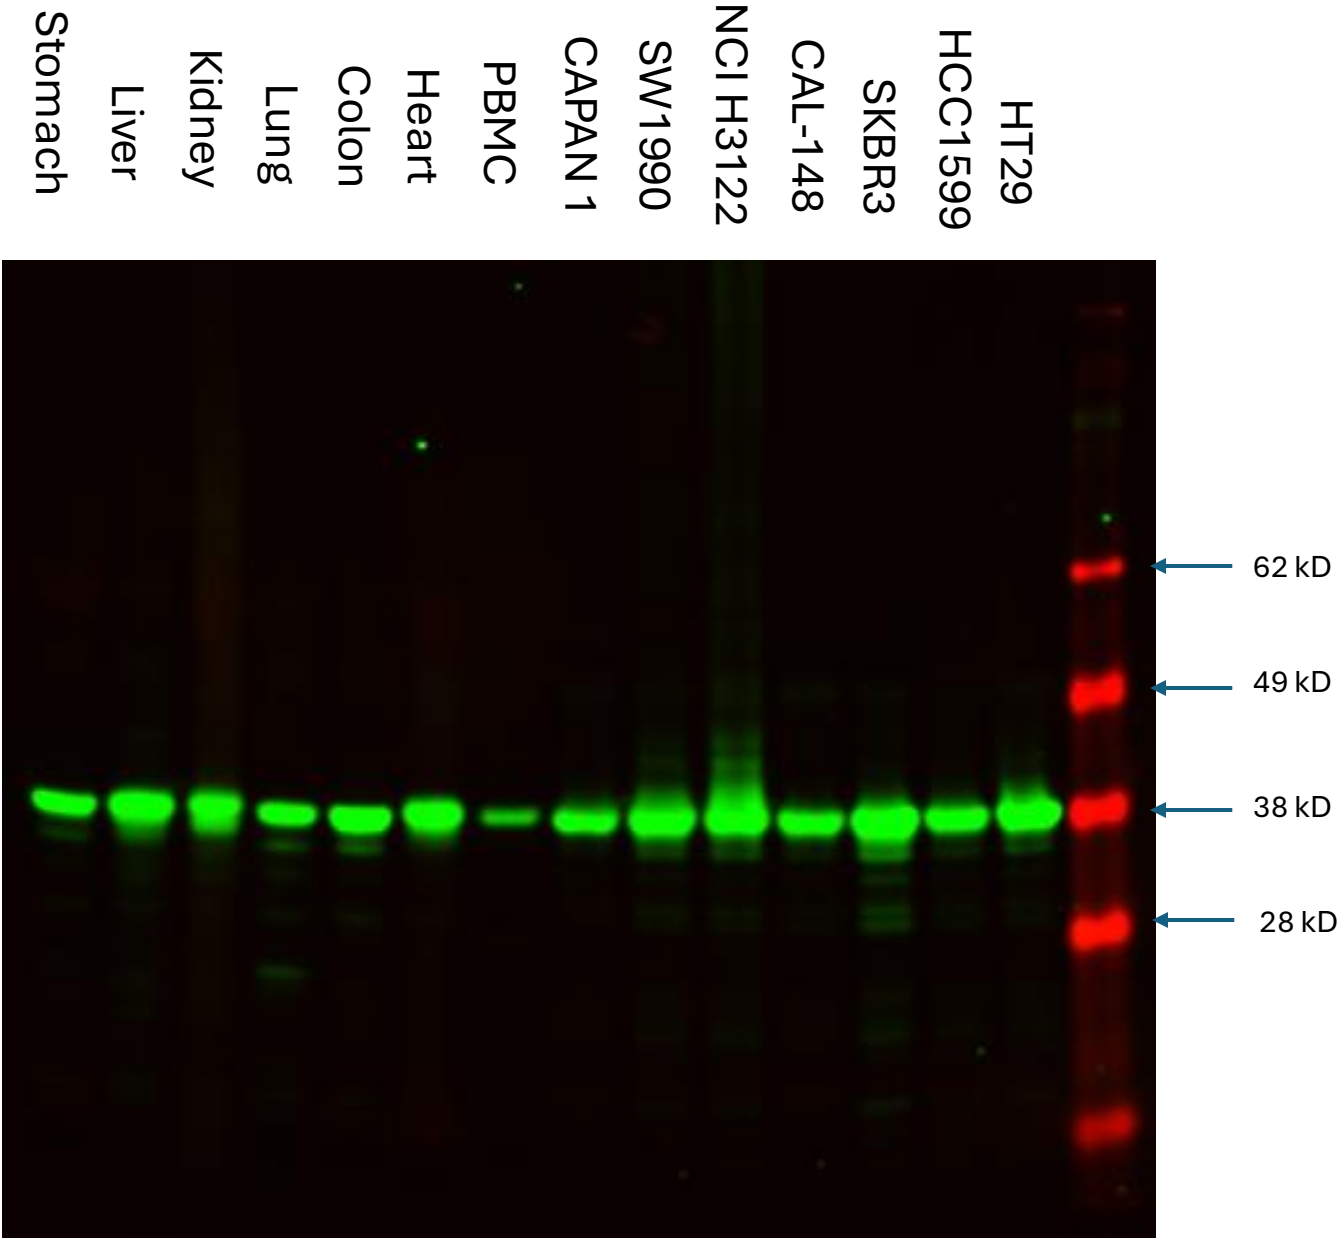

**Supplemental Figure 13. Unedited Western blots for Figure 7B.** Immunoblot shows TRAF-4 protein levels across heart tissue samples and in HT29 cells transfected with control or TRAF-4-targeting siRNA.

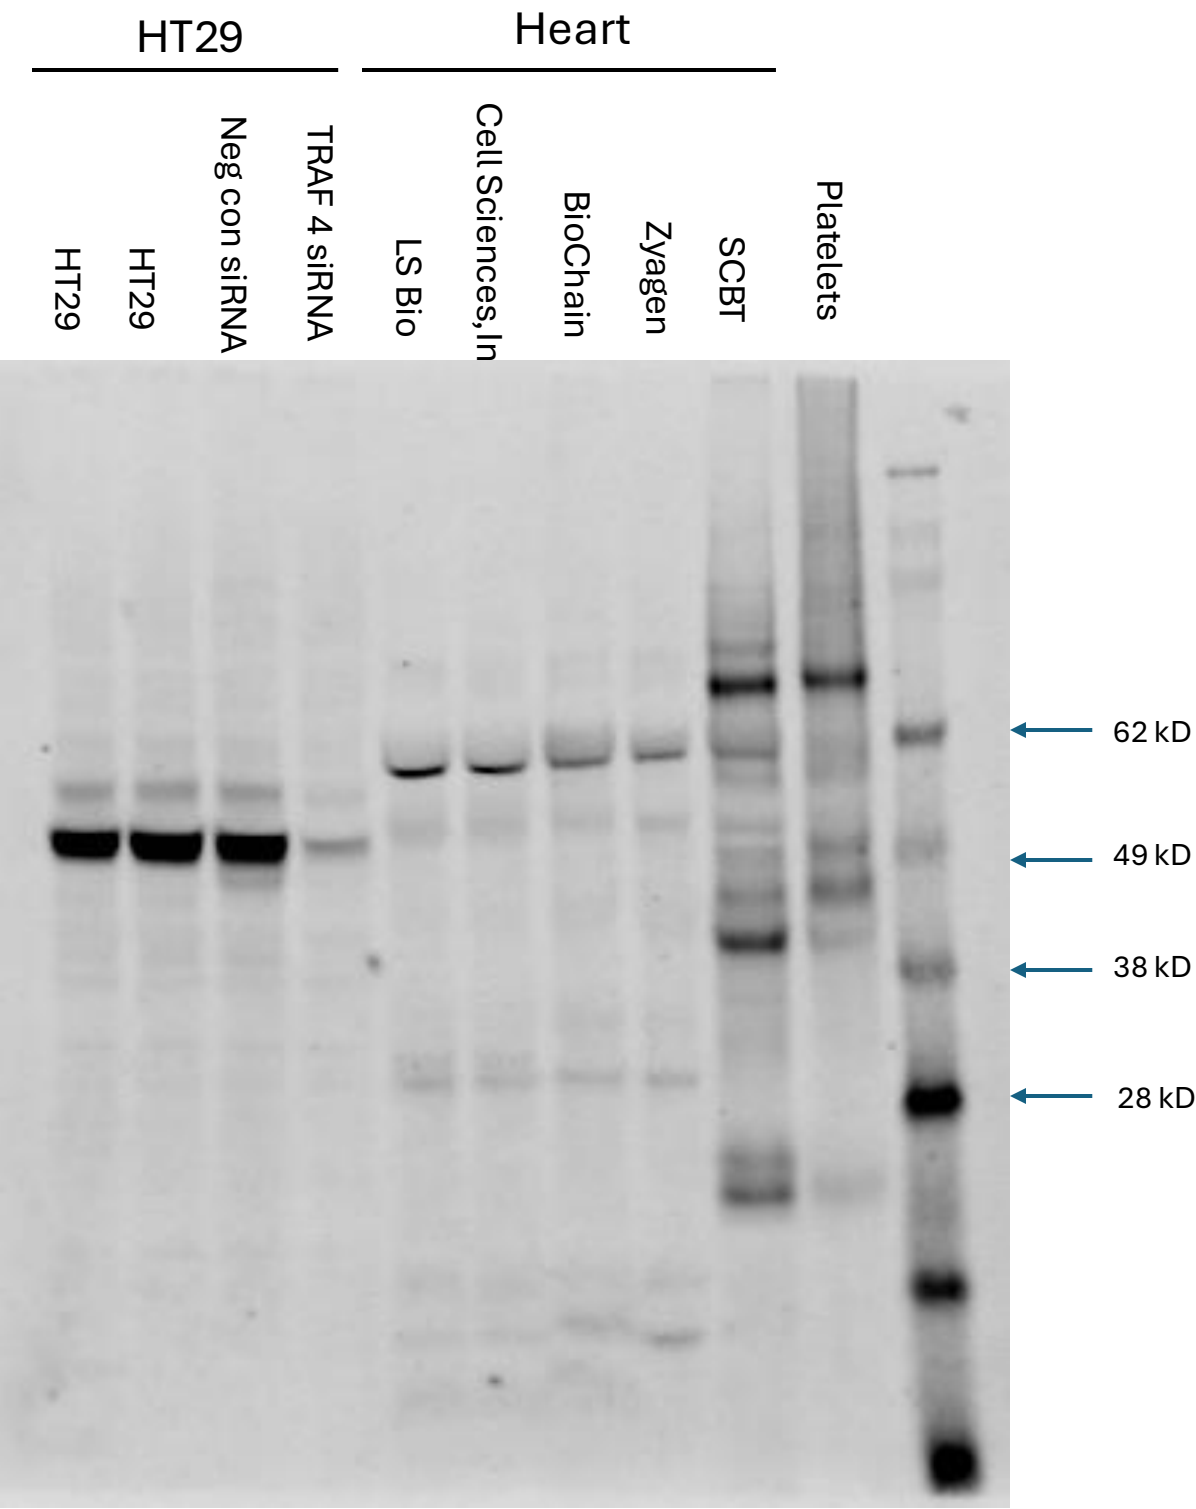

**Supplemental Figure 14. Unedited Western blots for Figure 7B, converted to black and white for publication.** Immunoblot shows GAPDH protein levels across heart tissue samples and in HT29 cells transfected with control or TRAF-4-targeting siRNA.

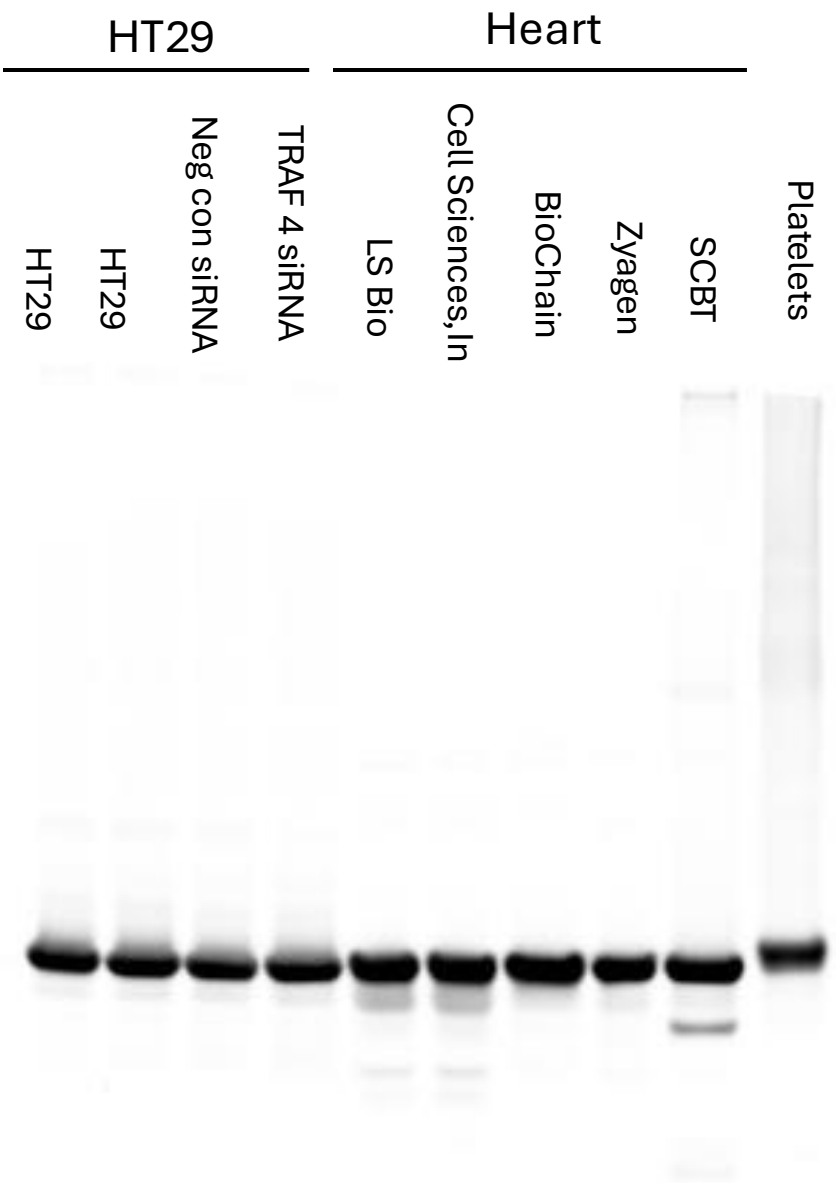

**Supplemental Figure 15. Unedited Western blots for Figure 7B, original two-color image from the LiCOR to better illustrate molecular weight markers.** Immunoblot shows GAPDH protein levels (green) across tumor specimens and cell lines.

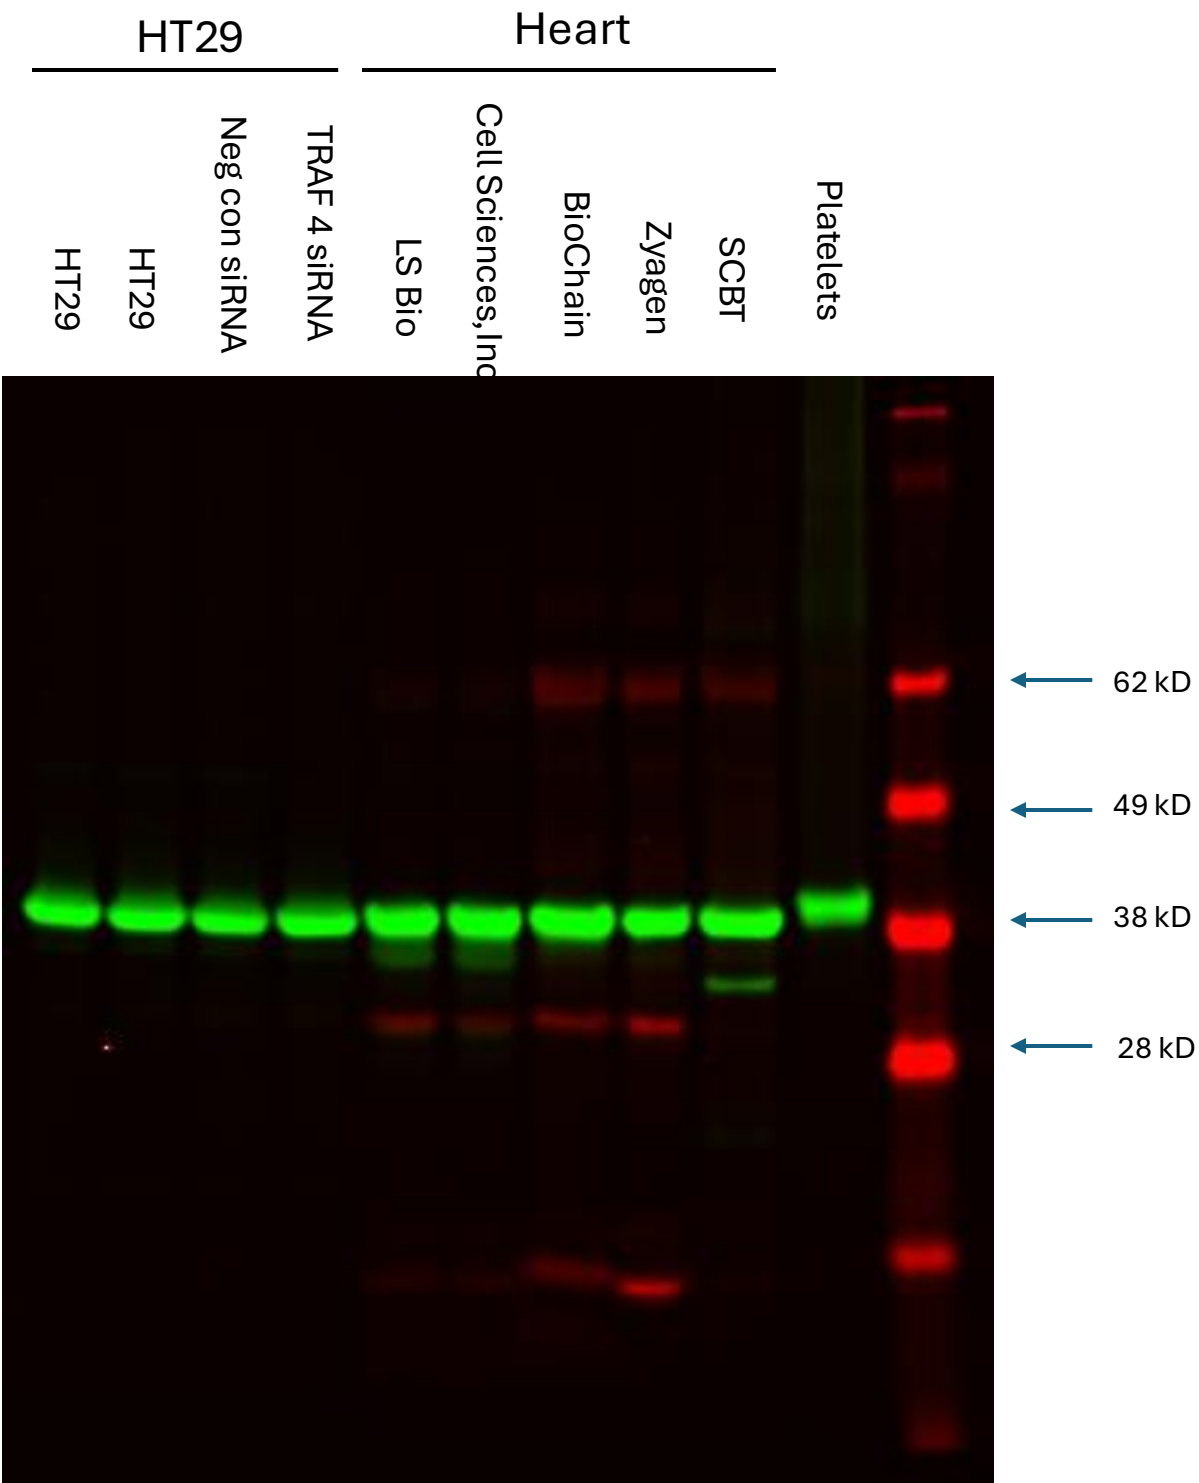

Supplement: d5cb00198f3.pdf [file d5cb00198f3.pdf]
