# Supplementary material for: Identification of ligands for E3 ligases with restricted expression using fragment-based methods
Source: Royal Society of Chemistry journal article supplement (doi:10.1039/d5cb00198f), 2025-01-01
Supplement: d5cb00198f2.zip [file Supplemental_table_2.xlsx]

## Sheet: Supplemental table 2 DE TvsN
NCBI.Gene	ENSG	gene_symbol	Type	Domain	E3_type	depmap_geneeffect	avg_log2FC	p_val_adj	p_val
7690	ENSG00000172262	ZNF131	Accessory	BTB	Accessory_BTB	-0.886651	0.493584	9.73e-302	0
7709	ENSG00000116809	ZBTB17	Accessory	BTB	Accessory_BTB	-0.628434	-0.356826	9.73e-302	0
83892	ENSG00000110906	KCTD10	Accessory	BTB	Accessory_BTB	-0.453449	-0.446436	3.71e-138	6.89e-143
79798	ENSG00000140691	ARMC5	Accessory	BTB	Accessory_BTB	-0.440885	0.101559	0.000999302	1.85e-08
55175	ENSG00000178502	KLHL11	Accessory	BTB	Accessory_BTB	-0.431965	0.204192	5.79e-07	1.07e-11
51341	ENSG00000178951	ZBTB7A	Accessory	BTB	Accessory_BTB	-0.391468	-0.104298	1.22e-102	2.26e-107
9880	ENSG00000166860	ZBTB39	Accessory	BTB	Accessory_BTB	-0.273135	0.518924	9.73e-302	0
25948	ENSG00000170852	KBTBD2	Accessory	BTB	Accessory_BTB	-0.257195	0.163456	9.49e-121	1.76e-125
3959	ENSG00000108679	LGALS3BP	Accessory	BTB	Accessory_BTB	-0.256075	1.92277	9.73e-302	0
114781	ENSG00000183826	BTBD9	Accessory	BTB	Accessory_BTB	-0.245982	0.202541	1.18e-145	2.2e-150
3749	ENSG00000116396	KCNC4	Accessory	BTB	Accessory_BTB	-0.244733	-0.754695	9.73e-302	0
84878	ENSG00000119574	ZBTB45	Accessory	BTB	Accessory_BTB	-0.218135	0.431819	9.73e-302	0
9817	ENSG00000079999	KEAP1	Accessory	BTB	Accessory_BTB	-0.215714	0.620327	9.73e-302	0
388419	ENSG00000204347	BTBD17	Accessory	BTB	Accessory_BTB	-0.20598	2.17362	8.25e-70	1.53e-74
3746	ENSG00000129159	KCNC1	Accessory	BTB	Accessory_BTB	-0.205035	-2.81977	9.73e-302	0
283219	ENSG00000188997	KCTD21	Accessory	BTB	Accessory_BTB	-0.204126	0.292553	6.6e-71	1.23e-75
3752	ENSG00000171385	KCND3	Accessory	BTB	Accessory_BTB	-0.20365	-0.730819	9.73e-302	0
131377	ENSG00000157119	KLHL40	Accessory	BTB	Accessory_BTB	-0.195488	-5.67245	9.73e-302	0
257240	ENSG00000185915	KLHL34	Accessory	BTB	Accessory_BTB	-0.193877	-1.9186	3.47e-171	6.44e-176
23510	ENSG00000180901	KCTD2	Accessory	BTB	Accessory_BTB	-0.188038	-0.377178	2.83e-190	5.26e-195
3755	ENSG00000026559	KCNG1	Accessory	BTB	Accessory_BTB	-0.185863	1.15206	1.7e-73	3.16e-78
54793	ENSG00000104756	KCTD9	Accessory	BTB	Accessory_BTB	-0.184967	-0.638386	9.73e-302	0
59349	ENSG00000117153	KLHL12	Accessory	BTB	Accessory_BTB	-0.184729	0.556474	9.73e-302	0
51043	ENSG00000160685	ZBTB7B	Accessory	BTB	Accessory_BTB	-0.183691	-0.208238	6.38e-17	1.18e-21
112939	ENSG00000160877	NACC1	Accessory	BTB	Accessory_BTB	-0.174709	1.25884	9.73e-302	0
881	ENSG00000185972	CCIN	Accessory	BTB	Accessory_BTB	-0.164036	-3.11066	1.39e-44	2.58e-49
55727	ENSG00000277222	BTBD7	Accessory	BTB	Accessory_BTB	-0.155502	0.176542	2.21e-35	4.1e-40
221504	ENSG00000213588	ZBTB9	Accessory	BTB	Accessory_BTB	-0.153233	1.33117	9.73e-302	0
23598	ENSG00000100105	PATZ1	Accessory	BTB	Accessory_BTB	-0.147099	1.19106	9.73e-302	0
79842	ENSG00000185670	ZBTB3	Accessory	BTB	Accessory_BTB	-0.145568	0.817662	9.73e-302	0
57528	ENSG00000183775	KCTD16	Accessory	BTB	Accessory_BTB	-0.144145	-0.737179	1.84e-66	3.42e-71
26249	ENSG00000146021	KLHL3	Accessory	BTB	Accessory_BTB	-0.143059	-1.80147	9.73e-302	0
55975	ENSG00000122550	KLHL7	Accessory	BTB	Accessory_BTB	-0.135738	0.294502	8.29e-263	1.54e-267
604	ENSG00000113916	BCL6	Accessory	BTB	Accessory_BTB	-0.130444	-2.17978	9.73e-302	0
317719	ENSG00000161594	KLHL10	Accessory	BTB	Accessory_BTB	-0.124492	-4.16163	9.73e-302	0
54442	ENSG00000167977	KCTD5	Accessory	BTB	Accessory_BTB	-0.11775	0.888183	9.73e-302	0
57621	ENSG00000181472	ZBTB2	Accessory	BTB	Accessory_BTB	-0.117237	0.576051	9.73e-302	0
340359	ENSG00000175946	KLHL38	Accessory	BTB	Accessory_BTB	-0.116988	-2.68938	2.8e-37	5.19e-42
1102	ENSG00000136161	RCBTB2	Accessory	BTB	Accessory_BTB	-0.115764	-0.10159	9.93e-123	1.84e-127
3738	ENSG00000177272	KCNA3	Accessory	BTB	Accessory_BTB	-0.112663	0.34833	1.38e-59	2.55e-64
170850	ENSG00000171126	KCNG3	Accessory	BTB	Accessory_BTB	-0.108093	0.956437	3.03e-252	5.61e-257
339745	ENSG00000144228	SPOPL	Accessory	BTB	Accessory_BTB	-0.104079	0.28945	1.05e-57	1.95e-62
653121	ENSG00000160062	ZBTB8A	Accessory	BTB	Accessory_BTB	-0.0981336	-0.132282	1.17e-27	2.17e-32
84280	ENSG00000148925	BTBD10	Accessory	BTB	Accessory_BTB	-0.0979725	0.181204	7.22e-156	1.34e-160
3747	ENSG00000166006	KCNC2	Accessory	BTB	Accessory_BTB	-0.0964624	0.12644	1	0.00115156
57542	ENSG00000087448	KLHL42	Accessory	BTB	Accessory_BTB	-0.0955915	-0.221028	2.13e-41	3.95e-46
51479	ENSG00000185722	ANKFY1	Accessory	BTB	Accessory_BTB	-0.0937826	0.203668	1.37e-17	2.54e-22
9923	ENSG00000184677	ZBTB40	Accessory	BTB	Accessory_BTB	-0.0873883	-0.621681	9.73e-302	0
3652	ENSG00000197429	IPP	Accessory	BTB	Accessory_BTB	-0.0854669	0.776764	9.73e-302	0
138151	ENSG00000148411	NACC2	Accessory	BTB	Accessory_BTB	-0.0850644	-0.834752	9.73e-302	0
9278	ENSG00000236104	ZBTB22	Accessory	BTB	Accessory_BTB	-0.0819503	0.312132	5.24e-291	9.73e-296
23119	ENSG00000169635	HIC2	Accessory	BTB	Accessory_BTB	-0.0809817	0.178549	2.56e-42	4.76e-47
9841	ENSG00000112365	ZBTB24	Accessory	BTB	Accessory_BTB	-0.0798536	0.573061	9.73e-302	0
92799	ENSG00000160410	SHKBP1	Accessory	BTB	Accessory_BTB	-0.0752908	0.162471	9.73e-302	0
3743	ENSG00000104848	KCNA7	Accessory	BTB	Accessory_BTB	-0.0737106	-3.18516	1.05e-64	1.96e-69
84861	ENSG00000099910	KLHL22	Accessory	BTB	Accessory_BTB	-0.0687425	0.170654	1.37e-48	2.54e-53
166348	ENSG00000187715	KBTBD12	Accessory	BTB	Accessory_BTB	-0.0651848	-1.43087	9.73e-302	0
84614	ENSG00000185278	ZBTB37	Accessory	BTB	Accessory_BTB	-0.0631501	-0.626865	9.73e-302	0
22890	ENSG00000126804	ZBTB1	Accessory	BTB	Accessory_BTB	-0.0625734	-0.249732	5.49e-147	1.02e-151
64395	ENSG00000087338	GMCL1	Accessory	BTB	Accessory_BTB	-0.0621462	0.793944	9.73e-302	0
22903	ENSG00000132640	BTBD3	Accessory	BTB	Accessory_BTB	-0.0606364	0.127063	5.64e-43	1.05e-47
154881	ENSG00000243335	KCTD7	Accessory	BTB	Accessory_BTB	-0.0598489	-0.888948	9.73e-302	0
8139	ENSG00000261609	GAN	Accessory	BTB	Accessory_BTB	-0.059791	-0.683932	4.95e-75	9.18e-80
89890	ENSG00000165572	KBTBD6	Accessory	BTB	Accessory_BTB	-0.0575891	0.415567	9.73e-302	0
10472	ENSG00000179456	ZBTB18	Accessory	BTB	Accessory_BTB	-0.0573466	-0.302646	1	0.693291
3090	ENSG00000177374	HIC1	Accessory	BTB	Accessory_BTB	-0.0562188	-1.05452	9.73e-302	0
121551	ENSG00000151136	ABTB3	Accessory	BTB	Accessory_BTB	-0.0550461	0.201647	1.01e-165	1.87e-170
3788	ENSG00000156486	KCNS2	Accessory	BTB	Accessory_BTB	-0.0532555	-1.51225	9.73e-302	0
3739	ENSG00000182255	KCNA4	Accessory	BTB	Accessory_BTB	-0.0466262	-1.91157	9.73e-302	0
377007	ENSG00000168427	KLHL30	Accessory	BTB	Accessory_BTB	-0.0463704	-3.22323	9.73e-302	0
23099	ENSG00000169155	ZBTB43	Accessory	BTB	Accessory_BTB	-0.0463605	-0.544258	9.73e-302	0
65987	ENSG00000151364	KCTD14	Accessory	BTB	Accessory_BTB	-0.0454211	2.0349	9.73e-302	0
3748	ENSG00000131398	KCNC3	Accessory	BTB	Accessory_BTB	-0.0433662	-0.495392	1.4e-69	2.6e-74
255877	ENSG00000161940	BCL6B	Accessory	BTB	Accessory_BTB	-0.0429081	-0.206843	1	0.0284876
64410	ENSG00000183655	KLHL25	Accessory	BTB	Accessory_BTB	-0.0423395	0.151426	1	0.0854858
55709	ENSG00000284900	KBTBD4	Accessory	BTB	Accessory_BTB	-0.0399223	0.745474	9.73e-302	0
90293	ENSG00000003096	KLHL13	Accessory	BTB	Accessory_BTB	-0.0381832	0.481012	1	0.0029302
3787	ENSG00000124134	KCNS1	Accessory	BTB	Accessory_BTB	-0.0347309	0.150421	5.13e-100	9.52e-105
10773	ENSG00000186130	ZBTB6	Accessory	BTB	Accessory_BTB	-0.0324286	0.703343	9.73e-302	0
64412	ENSG00000125812	GZF1	Accessory	BTB	Accessory_BTB	-0.0323339	-0.181656	4.02e-88	7.45e-93
3737	ENSG00000177301	KCNA2	Accessory	BTB	Accessory_BTB	-0.0322335	-4.12038	9.73e-302	0
27033	ENSG00000011590	ZBTB32	Accessory	BTB	Accessory_BTB	-0.0290615	-2.06077	9.26e-299	1.72e-303
3750	ENSG00000292214	KCND1	Accessory	BTB	Accessory_BTB	-0.0235942	-0.325626	1.31e-251	2.42e-256
7597	ENSG00000089775	ZBTB25	Accessory	BTB	Accessory_BTB	-0.019657	-0.563257	9.73e-302	0
79047	ENSG00000153885	KCTD15	Accessory	BTB	Accessory_BTB	-0.0180758	-0.295393	4.16e-130	7.72e-135
84767	ENSG00000291793	KLHL33	Accessory	BTB	Accessory_BTB	-0.0176512	-4.21776	9.73e-302	0
10324	ENSG00000239474	KLHL41	Accessory	BTB	Accessory_BTB	-0.0171532	-5.88985	9.73e-302	0
25998	ENSG00000283068	IBTK	Accessory	BTB	Accessory_BTB	-0.0167302	0.30234	5.79e-206	1.07e-210
386617	ENSG00000183783	KCTD8	Accessory	BTB	Accessory_BTB	-0.015884	-1.99017	9.73e-302	0
10009	ENSG00000177485	ZBTB33	Accessory	BTB	Accessory_BTB	-0.0154135	1.07493	9.73e-302	0
55295	ENSG00000167487	KLHL26	Accessory	BTB	Accessory_BTB	-0.00962612	-0.484688	9.73e-302	0
55892	ENSG00000085274	MYNN	Accessory	BTB	Accessory_BTB	-0.00899366	0.490523	9.73e-302	0
8216	ENSG00000099949	LZTR1	Accessory	BTB	Accessory_BTB	-0.00859852	-0.508487	9.73e-302	0
200845	ENSG00000168301	KCTD6	Accessory	BTB	Accessory_BTB	-0.00670361	-0.152019	2.69e-131	4.98e-136
284252	ENSG00000134504	KCTD1	Accessory	BTB	Accessory_BTB	-0.00591738	0.686227	9.73e-302	0
84078	ENSG00000120696	KBTBD7	Accessory	BTB	Accessory_BTB	-0.00204435	0.773778	9.73e-302	0
10625	ENSG00000116679	IVNS1ABP	Accessory	BTB	Accessory_BTB	0.00398058	0.309028	9.12e-218	1.69e-222
283518	ENSG00000198553	KCNRG	Accessory	BTB	Accessory_BTB	0.00503362	0.639584	2.08e-79	3.86e-84
7126	ENSG00000109079	TNFAIP1	Accessory	BTB	Accessory_BTB	0.00614068	0.358387	9.73e-302	0
166793	ENSG00000168826	ZBTB49	Accessory	BTB	Accessory_BTB	0.00682398	-0.341706	7.28e-241	1.35e-245
339451	ENSG00000187961	KLHL17	Accessory	BTB	Accessory_BTB	0.00709183	-0.652991	9.73e-302	0
9903	ENSG00000162413	KLHL21	Accessory	BTB	Accessory_BTB	0.00710381	-0.806129	9.73e-302	0
65986	ENSG00000205189	ZBTB10	Accessory	BTB	Accessory_BTB	0.00865212	0.640537	6.9e-242	1.28e-246
27012	ENSG00000164794	KCNV1	Accessory	BTB	Accessory_BTB	0.0210188	-0.871247	2.16e-72	4.01e-77
89857	ENSG00000172578	KLHL6	Accessory	BTB	Accessory_BTB	0.0210538	0.439308	1.82e-299	3.37e-304
360023	ENSG00000177888	ZBTB41	Accessory	BTB	Accessory_BTB	0.0212006	0.726134	9.73e-302	0
201501	ENSG00000184828	ZBTB7C	Accessory	BTB	Accessory_BTB	0.0256219	0.189754	1	0.00208569
54813	ENSG00000179454	KLHL28	Accessory	BTB	Accessory_BTB	0.0260069	0.25364	8.72e-84	1.62e-88
222658	ENSG00000112078	KCTD20	Accessory	BTB	Accessory_BTB	0.0266943	0.222466	2.31e-70	4.28e-75
115207	ENSG00000178695	KCTD12	Accessory	BTB	Accessory_BTB	0.0279277	-0.178242	5.76e-36	1.07e-40
8507	ENSG00000171617	ENC1	Accessory	BTB	Accessory_BTB	0.0285921	0.634193	9.73e-302	0
54800	ENSG00000114796	KLHL24	Accessory	BTB	Accessory_BTB	0.0295184	0.195713	1.5e-33	2.79e-38
3790	ENSG00000170745	KCNS3	Accessory	BTB	Accessory_BTB	0.0300052	0.84105	8.32e-169	1.54e-173
25841	ENSG00000166016	ABTB2	Accessory	BTB	Accessory_BTB	0.0311733	0.145082	1	0.84081
114792	ENSG00000186231	KLHL32	Accessory	BTB	Accessory_BTB	0.0313092	-0.550644	1	0.450777
80325	ENSG00000114626	ABTB1	Accessory	BTB	Accessory_BTB	0.0344758	-1.59367	9.73e-302	0
60468	ENSG00000112182	BACH2	Accessory	BTB	Accessory_BTB	0.0350852	-0.522134	9.73e-302	0
3736	ENSG00000111262	KCNA1	Accessory	BTB	Accessory_BTB	0.035535	-2.71327	9.73e-302	0
7541	ENSG00000198081	ZBTB14	Accessory	BTB	Accessory_BTB	0.0363188	0.303879	9.73e-302	0
55643	ENSG00000133243	BTBD2	Accessory	BTB	Accessory_BTB	0.0378557	0.319011	9.73e-302	0
3745	ENSG00000158445	KCNB1	Accessory	BTB	Accessory_BTB	0.0424737	-1.39048	9.73e-302	0
386618	ENSG00000180332	KCTD4	Accessory	BTB	Accessory_BTB	0.0447961	-2.11633	9.73e-302	0
79734	ENSG00000100379	KCTD17	Accessory	BTB	Accessory_BTB	0.0512402	-0.373231	0.229846	4.27e-06
140685	ENSG00000130584	ZBTB46	Accessory	BTB	Accessory_BTB	0.0569501	-0.24817	9.35e-05	1.74e-09
114818	ENSG00000119771	KLHL29	Accessory	BTB	Accessory_BTB	0.0571682	-0.987264	9.73e-302	0
55958	ENSG00000198642	KLHL9	Accessory	BTB	Accessory_BTB	0.0581237	0.493946	9.73e-302	0
57565	ENSG00000197705	KLHL14	Accessory	BTB	Accessory_BTB	0.061686	1.38702	3.29e-05	6.11e-10
401265	ENSG00000124743	KLHL31	Accessory	BTB	Accessory_BTB	0.0623476	-2.58032	0.000901468	1.67e-08
3741	ENSG00000130037	KCNA5	Accessory	BTB	Accessory_BTB	0.0640294	-3.0876	9.73e-302	0
253980	ENSG00000174943	KCTD13	Accessory	BTB	Accessory_BTB	0.0646191	-0.220685	0.288511	5.35e-06
49854	ENSG00000173276	ZBTB21	Accessory	BTB	Accessory_BTB	0.0672321	-0.145991	2.97e-08	5.52e-13
57626	ENSG00000150361	KLHL1	Accessory	BTB	Accessory_BTB	0.0692269	-0.664484	1	0.200271
57659	ENSG00000174282	ZBTB4	Accessory	BTB	Accessory_BTB	0.0702467	-0.429481	9.73e-302	0
23276	ENSG00000114648	KLHL18	Accessory	BTB	Accessory_BTB	0.0713908	-0.100923	1.14e-25	2.11e-30
29068	ENSG00000196323	ZBTB44	Accessory	BTB	Accessory_BTB	0.0820612	-0.191006	6e-119	1.11e-123
9920	ENSG00000273645	KBTBD11	Accessory	BTB	Accessory_BTB	0.0857271	-0.376988	9.73e-302	0
7704	ENSG00000109906	ZBTB16	Accessory	BTB	Accessory_BTB	0.0899308	-2.26003	9.73e-302	0
571	ENSG00000156273	BACH1	Accessory	BTB	Accessory_BTB	0.0954824	0.164872	4.52e-62	8.39e-67
84541	ENSG00000163376	KBTBD8	Accessory	BTB	Accessory_BTB	0.0992752	0.109535	6.98e-100	1.3e-104
51088	ENSG00000109790	KLHL5	Accessory	BTB	Accessory_BTB	0.104239	0.352912	1.09e-116	2.03e-121
9312	ENSG00000182674	KCNB2	Accessory	BTB	Accessory_BTB	0.104337	0.178945	5.52e-34	1.02e-38
26137	ENSG00000181722	ZBTB20	Accessory	BTB	Accessory_BTB	0.111698	-0.570626	9.73e-302	0
79786	ENSG00000135686	KLHL36	Accessory	BTB	Accessory_BTB	0.120289	1.60576	9.73e-302	0
57684	ENSG00000171448	ZBTB26	Accessory	BTB	Accessory_BTB	0.135344	-0.241325	2.33e-95	4.32e-100
57563	ENSG00000145332	KLHL8	Accessory	BTB	Accessory_BTB	0.135915	0.504615	9.73e-302	0
56062	ENSG00000102271	KLHL4	Accessory	BTB	Accessory_BTB	0.148228	-0.223243	6.45e-141	1.2e-145
51133	ENSG00000136636	KCTD3	Accessory	BTB	Accessory_BTB	0.150562	0.484748	8e-153	1.49e-157
151230	ENSG00000213160	KLHL23	Accessory	BTB	Accessory_BTB	NA	0.494366	5.37e-220	9.96e-225
196872	ENSG00000258701	VESTAR	Accessory	BTB	Accessory_BTB	NA	1.14853	9.73e-302	0
1642	ENSG00000167986	DDB1	Accessory	CPSF_A	Accessory_CPSF_A	-2.07927	0.603303	9.73e-302	0
23450	ENSG00000189091	SF3B3	Accessory	CPSF_A	Accessory_CPSF_A	-2.05608	0.776247	9.73e-302	0
29894	ENSG00000071894	CPSF1	Accessory	CPSF_A	Accessory_CPSF_A	-1.36673	0.110778	7.79e-38	1.45e-42
8453	ENSG00000108094	CUL2	Accessory	Cullin	Accessory_Cullin	-0.744908	0.324361	9.73e-302	0
8452	ENSG00000036257	CUL3	Accessory	Cullin	Accessory_Cullin	-0.569417	0.174792	9.73e-302	0
9820	ENSG00000044090	CUL7	Accessory	Cullin	Accessory_Cullin	-0.261909	0.633279	9.73e-302	0
8450	ENSG00000158290	CUL4B	Accessory	Cullin	Accessory_Cullin	-0.0514413	0.164585	1.35e-184	2.5e-189
8065	ENSG00000166266	CUL5	Accessory	Cullin	Accessory_Cullin	0.18202	0.195307	2.53e-131	4.69e-136
26271	ENSG00000112029	FBXO5	Accessory	F-box	Accessory_F-box	-1.17935	1.40517	9.73e-302	0
6502	ENSG00000145604	SKP2	Accessory	F-box	Accessory_F-box	-0.793535	1.31143	9.73e-302	0
23219	ENSG00000143756	FBXO28	Accessory	F-box	Accessory_F-box	-0.281431	0.617884	9.73e-302	0
345930	ENSG00000203734	ECT2L	Accessory	F-box	Accessory_F-box	-0.275104	0.240546	1	0.0358625
6924	ENSG00000011007	ELOA	Accessory	F-box	Accessory_F-box	-0.239953	0.469692	9.73e-302	0
26233	ENSG00000285442	FBXL6	Accessory	F-box	Accessory_F-box	-0.219147	0.736941	9.73e-302	0
80204	ENSG00000138081	FBXO11	Accessory	F-box	Accessory_F-box	-0.203139	0.106521	2.2e-11	4.09e-16
130888	ENSG00000153832	FBXO36	Accessory	F-box	Accessory_F-box	-0.193929	0.634288	1.22e-283	2.26e-288
26273	ENSG00000110429	FBXO3	Accessory	F-box	Accessory_F-box	-0.177132	-0.366885	9.73e-302	0
80028	ENSG00000155034	FBXL18	Accessory	F-box	Accessory_F-box	-0.166987	0.718428	9.73e-302	0
54455	ENSG00000291375	FBXO42	Accessory	F-box	Accessory_F-box	-0.147018	-0.271767	2.38e-191	4.41e-196
26263	ENSG00000167196	FBXO22	Accessory	F-box	Accessory_F-box	-0.144208	0.349018	9.73e-302	0
23014	ENSG00000135108	FBXO21	Accessory	F-box	Accessory_F-box	-0.140367	0.265232	2.74e-151	5.08e-156
6468	ENSG00000107829	FBXW4	Accessory	F-box	Accessory_F-box	-0.121983	-0.33551	9.73e-302	0
150726	ENSG00000163013	FBXO41	Accessory	F-box	Accessory_F-box	-0.118772	-0.67108	2.22e-161	4.12e-166
55336	ENSG00000135722	FBXL8	Accessory	F-box	Accessory_F-box	-0.118608	-1.04667	9.73e-302	0
899	ENSG00000162063	CCNF	Accessory	F-box	Accessory_F-box	-0.108781	1.99528	9.73e-302	0
26268	ENSG00000112146	FBXO9	Accessory	F-box	Accessory_F-box	-0.105034	-0.480367	9.73e-302	0
146330	ENSG00000127585	FBXL16	Accessory	F-box	Accessory_F-box	-0.104236	-2.11452	3.87e-57	7.18e-62
79176	ENSG00000107872	FBXL15	Accessory	F-box	Accessory_F-box	-0.0970566	-0.327918	9.73e-302	0
84678	ENSG00000089094	KDM2B	Accessory	F-box	Accessory_F-box	-0.0646662	0.437945	9.73e-302	0
144699	ENSG00000171823	FBXL14	Accessory	F-box	Accessory_F-box	-0.0612419	0.68163	9.73e-302	0
26259	ENSG00000174989	FBXW8	Accessory	F-box	Accessory_F-box	-0.0565182	0.436711	9.73e-302	0
51725	ENSG00000163833	FBXO40	Accessory	F-box	Accessory_F-box	-0.0490391	-5.23505	9.73e-302	0
93611	ENSG00000132879	FBXO44	Accessory	F-box	Accessory_F-box	-0.045099	-1.09389	9.73e-302	0
23403	ENSG00000177051	FBXO46	Accessory	F-box	Accessory_F-box	-0.0397709	0.535015	9.73e-302	0
26261	ENSG00000106336	FBXO24	Accessory	F-box	Accessory_F-box	-0.0375137	-1.64397	1.23e-173	2.29e-178
54461	ENSG00000159069	FBXW5	Accessory	F-box	Accessory_F-box	-0.0360581	-0.281448	2.17e-209	4.03e-214
25827	ENSG00000153558	FBXL2	Accessory	F-box	Accessory_F-box	-0.0324164	-0.423418	6.92e-40	1.28e-44
55294	ENSG00000109670	FBXW7	Accessory	F-box	Accessory_F-box	-0.0227094	-0.933824	9.73e-302	0
26232	ENSG00000116661	FBXO2	Accessory	F-box	Accessory_F-box	-0.0208457	-0.44169	1	0.0130799
222235	ENSG00000161040	FBXL13	Accessory	F-box	Accessory_F-box	-0.00747322	-0.227036	3.03e-121	5.62e-126
26235	ENSG00000112234	FBXL4	Accessory	F-box	Accessory_F-box	-0.00399046	0.236525	6.55e-127	1.22e-131
26272	ENSG00000151876	FBXO4	Accessory	F-box	Accessory_F-box	0.00462039	0.587508	9.73e-302	0
79791	ENSG00000103264	FBXO31	Accessory	F-box	Accessory_F-box	0.00477164	-0.961646	9.73e-302	0
23194	ENSG00000183580	FBXL7	Accessory	F-box	Accessory_F-box	0.0108677	-0.665134	9.73e-302	0
26260	ENSG00000147364	FBXO25	Accessory	F-box	Accessory_F-box	0.0126455	0.184293	2.39e-22	4.44e-27
84961	ENSG00000108306	FBXL20	Accessory	F-box	Accessory_F-box	0.0240135	0.109589	0.928755	1.72e-05
26270	ENSG00000116663	FBXO6	Accessory	F-box	Accessory_F-box	0.0275559	0.936884	9.73e-302	0
55030	ENSG00000178974	FBXO34	Accessory	F-box	Accessory_F-box	0.0291591	0.366796	9.73e-302	0
26190	ENSG00000119402	FBXW2	Accessory	F-box	Accessory_F-box	0.0334714	-0.176133	6.05e-211	1.12e-215
115290	ENSG00000282954	FBXO17	Accessory	F-box	Accessory_F-box	0.0354793	-0.317759	9.73e-302	0
201456	ENSG00000141665	FBXO15	Accessory	F-box	Accessory_F-box	0.0461932	-0.168351	2.44e-89	4.53e-94
200933	ENSG00000174013	FBXO45	Accessory	F-box	Accessory_F-box	0.048089	0.838075	9.73e-302	0
26267	ENSG00000147912	FBXO10	Accessory	F-box	Accessory_F-box	0.0600819	-1.11871	9.73e-302	0
157574	ENSG00000214050	FBXO16	Accessory	F-box	Accessory_F-box	0.085548	0.742966	9.73e-302	0
114907	ENSG00000156804	FBXO32	Accessory	F-box	Accessory_F-box	0.121174	-1.44067	4.31e-26	8e-31
84085	ENSG00000118496	FBXO30	Accessory	F-box	Accessory_F-box	0.123201	-0.285715	1.01e-13	1.88e-18
126433	ENSG00000161243	FBXO27	Accessory	F-box	Accessory_F-box	0.123689	0.32962	1	0.00581954
26269	ENSG00000164117	FBXO8	Accessory	F-box	Accessory_F-box	0.132954	0.107192	1.38e-11	2.57e-16
28962	ENSG00000081087	OSTM1	Accessory	OSTMP1	Accessory_OSTMP1	0.0387184	0.128765	0.00267264	4.96e-08
546	ENSG00000085224	ATRX	Accessory	PHD	Accessory_PHD	-0.210753	0.188383	0.0019032	3.53e-08
8193	ENSG00000011332	DPF1	Accessory	PHD	Accessory_PHD	-0.129478	-0.281926	8.06e-280	1.5e-284
7468	ENSG00000109685	NSD2	Accessory	PHD	Accessory_PHD	-0.0626069	0.519513	9.73e-302	0
140459	ENSG00000148331	ASB6	Accessory	SOCS box	Accessory_SOCS box	-0.31	0.124088	1.84e-67	3.41e-72
9655	ENSG00000171150	SOCS5	Accessory	SOCS box	Accessory_SOCS box	-0.275194	-0.145129	8.31e-26	1.54e-30
9021	ENSG00000184557	SOCS3	Accessory	SOCS box	Accessory_SOCS box	-0.262905	-0.664801	1.14e-12	2.12e-17
55884	ENSG00000176871	WSB2	Accessory	SOCS box	Accessory_SOCS box	-0.208126	0.528924	9.73e-302	0
92591	ENSG00000161664	ASB16	Accessory	SOCS box	Accessory_SOCS box	-0.181312	-0.721869	2.23e-123	4.13e-128
140461	ENSG00000177981	ASB8	Accessory	SOCS box	Accessory_SOCS box	-0.124386	-0.18171	5.63e-14	1.04e-18
122809	ENSG00000180008	SOCS4	Accessory	SOCS box	Accessory_SOCS box	-0.0948882	0.147338	7.85e-13	1.46e-17
1154	ENSG00000114737	CISH	Accessory	SOCS box	Accessory_SOCS box	-0.0934702	0.572672	2.48e-272	4.6e-277
140460	ENSG00000183475	ASB7	Accessory	SOCS box	Accessory_SOCS box	-0.0780487	0.586312	9.73e-302	0
30837	ENSG00000274211	SOCS7	Accessory	SOCS box	Accessory_SOCS box	-0.0746593	-0.36074	1.26e-33	2.33e-38
10966	ENSG00000141542	RAB40B	Accessory	SOCS box	Accessory_SOCS box	-0.0672191	-0.389338	1.59e-13	2.95e-18
26118	ENSG00000109046	WSB1	Accessory	SOCS box	Accessory_SOCS box	-0.0544819	-1.36813	9.73e-302	0
142684	ENSG00000172476	RAB40A	Accessory	SOCS box	Accessory_SOCS box	-0.0507274	-0.985054	9.73e-302	0
127247	ENSG00000154007	ASB17	Accessory	SOCS box	Accessory_SOCS box	-0.0463904	-3.55056	1.27e-130	2.36e-135
56995	ENSG00000130338	TULP4	Accessory	SOCS box	Accessory_SOCS box	-0.0403527	0.456547	9.73e-302	0
90864	ENSG00000162032	SPSB3	Accessory	SOCS box	Accessory_SOCS box	-0.0276227	-3.34273	9.73e-302	0
51130	ENSG00000115239	ASB3	Accessory	SOCS box	Accessory_SOCS box	-0.0246412	-1.92275	9.73e-302	0
136371	ENSG00000146926	ASB10	Accessory	SOCS box	Accessory_SOCS box	-0.0218793	-4.01887	1.2e-171	2.22e-176
8835	ENSG00000120833	SOCS2	Accessory	SOCS box	Accessory_SOCS box	-0.0137546	-0.487421	2.83e-181	5.25e-186
8651	ENSG00000185338	SOCS1	Accessory	SOCS box	Accessory_SOCS box	-0.00640116	0.834067	9.73e-302	0
9306	ENSG00000170677	SOCS6	Accessory	SOCS box	Accessory_SOCS box	-0.00191783	0.572175	9.73e-302	0
57799	ENSG00000197562	RAB40C	Accessory	SOCS box	Accessory_SOCS box	0.00177957	-0.214524	1	0.00150086
92369	ENSG00000175093	SPSB4	Accessory	SOCS box	Accessory_SOCS box	0.021108	0.391883	2.89e-27	5.35e-32
140825	ENSG00000124257	NEURL2	Accessory	SOCS box	Accessory_SOCS box	0.0242978	0.531573	9.73e-302	0
401036	ENSG00000182177	ASB18	Accessory	SOCS box	Accessory_SOCS box	0.0493378	-0.638652	6.42e-130	1.19e-134
84727	ENSG00000111671	SPSB2	Accessory	SOCS box	Accessory_SOCS box	0.0534845	1.15375	9.73e-302	0
142686	ENSG00000239388	ASB14	Accessory	SOCS box	Accessory_SOCS box	0.0538866	-0.605055	9.73e-302	0
282808	ENSG00000102128	RAB40AL	Accessory	SOCS box	Accessory_SOCS box	0.0680365	0.668793	9.73e-302	0
140462	ENSG00000102048	ASB9	Accessory	SOCS box	Accessory_SOCS box	0.0913556	0.881928	9.73e-302	0
140458	ENSG00000164122	ASB5	Accessory	SOCS box	Accessory_SOCS box	0.0945346	-2.96237	9.73e-302	0
79754	ENSG00000196372	ASB13	Accessory	SOCS box	Accessory_SOCS box	0.150317	0.605711	9.73e-302	0
51676	ENSG00000100628	ASB2	Accessory	SOCS box	Accessory_SOCS box	0.151621	-2.5863	4.79e-174	8.89e-179
51666	ENSG00000005981	ASB4	Accessory	SOCS box	Accessory_SOCS box	0.15781	-0.601001	2.58e-202	4.79e-207
140456	ENSG00000165192	ASB11	Accessory	SOCS box	Accessory_SOCS box	0.178956	-1.75697	2.84e-86	5.27e-91
142685	ENSG00000146809	ASB15	Accessory	SOCS box	Accessory_SOCS box	0.181127	-4.66418	7.97e-88	1.48e-92
7428	ENSG00000134086	VHL	Accessory	SOCS box	Accessory_SOCS box	-1.01824	0.663101	9.73e-302	0
161725	ENSG00000169918	OTUD7A	Accessory	UBA_4	Accessory_UBA_4	-0.0364977	-1.5027	9.73e-302	0
2966	ENSG00000276910	GTF2H2	Accessory	vWA_transcription_factor_IIH_type	Accessory_vWA_transcription_factor_IIH_type	NA	0.105328	9.69e-18	1.8e-22
7763	ENSG00000107372	ZFAND5	Accessory	zf-A20	Accessory_zf-A20	-0.375925	-0.831414	9.73e-302	0
27342	ENSG00000154710	RABGEF1	Accessory	zf-A20	Accessory_zf-A20	-0.251607	1.15198	9.73e-302	0
60685	ENSG00000156639	ZFAND3	Accessory	zf-A20	Accessory_zf-A20	-0.174873	0.270841	9.73e-302	0
54469	ENSG00000086666	ZFAND6	Accessory	zf-A20	Accessory_zf-A20	-0.0556505	0.387517	9.73e-302	0
56957	ENSG00000264522	OTUD7B	Accessory	zf-A20	Accessory_zf-A20	0.02551	0.233586	2.23e-99	4.15e-104
7128	ENSG00000118503	TNFAIP3	Accessory	zf-A20	Accessory_zf-A20	0.0388024	-0.314009	1	0.183282
93550	ENSG00000172671	ZFAND4	Accessory	ZnF_AN1	Accessory_ZnF_AN1	0.118205	-0.446891	4.38e-13	8.13e-18
51185	ENSG00000113851	CRBN	Accessory			0.0556363	-0.116344	4.29e-19	1.2e-23
129025	ENSG00000169548	ZNF280A	E3	HECT	E3_HECT	-0.0542267	2.18982	9.73e-302	0
90025	ENSG00000118420	UBE3D	E3	HECT_2	E3_HECT_2	-0.24503	0.307079	9.33e-122	1.73e-126
10075	ENSG00000086758	HUWE1	E3	HECTc	E3_HECTc	-0.931116	0.348393	2.15e-298	3.99e-303
51366	ENSG00000104517	UBR5	E3	HECTc	E3_HECTc	-0.683613	0.139834	1.42e-34	2.64e-39
25831	ENSG00000092148	HECTD1	E3	HECTc	E3_HECTc	-0.506987	-0.217239	4.8e-132	8.91e-137
64750	ENSG00000108854	SMURF2	E3	HECTc	E3_HECTc	-0.222684	0.232064	9.33e-90	1.73e-94
9320	ENSG00000153827	TRIP12	E3	HECTc	E3_HECTc	-0.214427	0.116553	7.18e-47	1.33e-51
8924	ENSG00000277278	HERC2	E3	HECTc	E3_HECTc	-0.166754	-0.292915	9.73e-302	0
7337	ENSG00000114062	UBE3A	E3	HECTc	E3_HECTc	-0.0939158	0.248304	4.99e-182	9.25e-187
57531	ENSG00000085382	HACE1	E3	HECTc	E3_HECTc	-0.0599152	-0.542195	9.73e-302	0
55632	ENSG00000092140	G2E3	E3	HECTc	E3_HECTc	-0.0556759	0.318677	1.36e-204	2.52e-209
9690	ENSG00000009335	UBE3C	E3	HECTc	E3_HECTc	-0.0325299	0.442295	9.73e-302	0
8925	ENSG00000103657	HERC1	E3	HECTc	E3_HECTc	-0.0175195	-0.660709	9.73e-302	0
83737	ENSG00000078747	ITCH	E3	HECTc	E3_HECTc	-0.0146292	0.166511	4.47e-84	8.29e-89
8916	ENSG00000138641	HERC3	E3	HECTc	E3_HECTc	-0.0143826	-0.56339	9.73e-302	0
26091	ENSG00000148634	HERC4	E3	HECTc	E3_HECTc	-0.00775823	-0.255417	2.24e-289	4.16e-294
51191	ENSG00000138646	HERC5	E3	HECTc	E3_HECTc	-0.00490255	0.376961	1.69e-119	3.13e-124
11059	ENSG00000123124	WWP1	E3	HECTc	E3_HECTc	-0.00317635	0.500599	2.04e-81	3.79e-86
55008	ENSG00000138642	HERC6	E3	HECTc	E3_HECTc	-0.003143	1.04786	9.73e-302	0
143279	ENSG00000165338	HECTD2	E3	HECTc	E3_HECTc	0.0248791	-0.789884	9.73e-302	0
23327	ENSG00000049759	NEDD4L	E3	HECTc	E3_HECTc	0.0270244	0.870402	9.73e-302	0
4734	ENSG00000069869	NEDD4	E3	HECTc	E3_HECTc	0.0293923	-0.381788	1	0.0149273
23072	ENSG00000002746	HECW1	E3	HECTc	E3_HECTc	0.0294497	-0.630555	3.44e-30	6.39e-35
57520	ENSG00000138411	HECW2	E3	HECTc	E3_HECTc	0.0453043	-0.280123	7.93e-36	1.47e-40
283450	ENSG00000173064	HECTD4	E3	HECTc	E3_HECTc	0.217934	-0.618882	9.73e-302	0
246330	ENSG00000174516	PELI3	E3	PELI	E3_PELI	-0.0366882	-0.418454	4.27e-176	7.92e-181
57161	ENSG00000139946	PELI2	E3	PELI	E3_PELI	-0.0258696	-0.72454	9.73e-302	0
57162	ENSG00000197329	PELI1	E3	PELI	E3_PELI	0.0330394	-0.230778	9.34e-16	1.73e-20
51529	ENSG00000141552	ANAPC11	E3	RING	E3_RING	-1.94172	0.992343	9.73e-302	0
7737	ENSG00000125352	RNF113A	E3	RING	E3_RING	-1.06847	0.701733	9.73e-302	0
4331	ENSG00000020426	MNAT1	E3	RING	E3_RING	-0.995732	0.37779	9.73e-302	0
56888	ENSG00000176407	KCMF1	E3	RING	E3_RING	-0.962045	0.134148	3.22e-146	5.98e-151
27072	ENSG00000006715	VPS41	E3	RING	E3_RING	-0.920209	0.407367	9.73e-302	0
57617	ENSG00000104142	VPS18	E3	RING	E3_RING	-0.915273	0.691479	9.73e-302	0
5930	ENSG00000122257	RBBP6	E3	RING	E3_RING	-0.885352	-0.347031	9.73e-302	0
10293	ENSG00000183763	TRAIP	E3	RING	E3_RING	-0.881291	1.29041	9.73e-302	0
9978	ENSG00000100387	RBX1	E3	RING	E3_RING	-0.792753	0.662079	9.73e-302	0
6047	ENSG00000063978	RNF4	E3	RING	E3_RING	-0.709617	0.239749	9.73e-302	0
197370	ENSG00000169189	NSMCE1	E3	RING	E3_RING	-0.687959	0.941066	9.73e-302	0
4193	ENSG00000135679	MDM2	E3	RING	E3_RING	-0.684355	0.903775	9.73e-302	0
580	ENSG00000138376	BARD1	E3	RING	E3_RING	-0.681082	0.511707	9.73e-302	0
56254	ENSG00000155827	RNF20	E3	RING	E3_RING	-0.671115	0.414158	9.73e-302	0
9025	ENSG00000112130	RNF8	E3	RING	E3_RING	-0.624297	0.208124	1.57e-133	2.91e-138
165918	ENSG00000163961	RNF168	E3	RING	E3_RING	-0.584841	0.154965	1	0.0496105
672	ENSG00000012048	BRCA1	E3	RING	E3_RING	-0.550468	1.32196	9.73e-302	0
9810	ENSG00000103549	RNF40	E3	RING	E3_RING	-0.528597	0.7984	9.73e-302	0
79872	ENSG00000105879	CBLL1	E3	RING	E3_RING	-0.51096	0.539953	9.73e-302	0
64795	ENSG00000153561	RMND5A	E3	RING	E3_RING	-0.493299	0.161289	4.51e-233	8.36e-238
54708	ENSG00000198060	MARCHF5	E3	RING	E3_RING	-0.478177	0.321129	9.73e-302	0
8085	ENSG00000167548	KMT2D	E3	RING	E3_RING	-0.454357	-0.197985	7.21e-247	1.34e-251
92312	ENSG00000254726	MEX3A	E3	RING	E3_RING	-0.447293	3.69466	9.73e-302	0
84447	ENSG00000162298	SYVN1	E3	RING	E3_RING	-0.447061	0.375881	9.73e-302	0
23608	ENSG00000133606	MKRN1	E3	RING	E3_RING	-0.434574	0.412566	9.73e-302	0
7186	ENSG00000127191	TRAF2	E3	RING	E3_RING	-0.418195	0.860485	9.73e-302	0
92979	ENSG00000139266	MARCHF9	E3	RING	E3_RING	-0.40831	0.589897	9.73e-302	0
79726	ENSG00000103091	WDR59	E3	RING	E3_RING	-0.40184	-0.419261	9.73e-302	0
9604	ENSG00000013561	RNF14	E3	RING	E3_RING	-0.37887	0.238125	1.65e-83	3.06e-88
4591	ENSG00000108395	TRIM37	E3	RING	E3_RING	-0.378351	0.212267	9.73e-302	0
118472	ENSG00000198546	ZNF511	E3	RING	E3_RING	-0.360175	0.128529	1	0.00083518
55159	ENSG00000168411	RFWD3	E3	RING	E3_RING	-0.355928	1.0777	9.73e-302	0
64326	ENSG00000143207	COP1	E3	RING	E3_RING	-0.340847	0.739798	9.73e-302	0
63891	ENSG00000164068	RNF123	E3	RING	E3_RING	-0.33953	-0.213569	9.58e-18	1.78e-22
7844	ENSG00000239305	RNF103	E3	RING	E3_RING	-0.33248	0.309488	1.81e-173	3.35e-178
129868	ENSG00000292076	TRIM43	E3	RING	E3_RING	-0.32699	1.40809	9.73e-302	0
51255	ENSG00000168894	RNF181	E3	RING	E3_RING	-0.296063	0.889336	9.73e-302	0
80128	ENSG00000163462	TRIM46	E3	RING	E3_RING	-0.295748	-0.469268	1	0.00654361
113878	ENSG00000091073	DTX2	E3	RING	E3_RING	-0.292484	0.602088	9.73e-302	0
57534	ENSG00000101752	MIB1	E3	RING	E3_RING	-0.2717	0.368068	1.15e-153	2.13e-158
339834	ENSG00000173421	IHO1	E3	RING	E3_RING	-0.264972	-2.27413	9.73e-302	0
29128	ENSG00000276043	UHRF1	E3	RING	E3_RING	-0.264731	2.40941	9.73e-302	0
114088	ENSG00000100505	TRIM9	E3	RING	E3_RING	-0.264701	-0.419203	5e-204	9.27e-209
221527	ENSG00000204366	ZBTB12	E3	RING	E3_RING	-0.26407	1.65875	9.73e-302	0
57820	ENSG00000291784	CCNB1IP1	E3	RING	E3_RING	-0.260131	0.173299	3.43e-12	6.37e-17
10155	ENSG00000130726	TRIM28	E3	RING	E3_RING	-0.255117	0.90982	9.73e-302	0
329	ENSG00000110330	BIRC2	E3	RING	E3_RING	-0.253541	0.350605	1.18e-234	2.18e-239
7703	ENSG00000277258	PCGF2	E3	RING	E3_RING	-0.252648	0.865459	9.73e-302	0
55120	ENSG00000115392	FANCL	E3	RING	E3_RING	-0.249743	1.07446	9.73e-302	0
10193	ENSG00000181852	RNF41	E3	RING	E3_RING	-0.234823	0.216667	1.21e-113	2.25e-118
8315	ENSG00000089234	BRAP	E3	RING	E3_RING	-0.228779	0.240447	9.73e-302	0
64320	ENSG00000163481	RNF25	E3	RING	E3_RING	-0.226619	0.263018	2.89e-235	5.36e-240
84767	ENSG00000215277	RNF212B	E3	RING	E3_RING	-0.221446	0.646897	9.73e-302	0
4194	ENSG00000198625	MDM4	E3	RING	E3_RING	-0.219909	-0.496544	9.73e-302	0
57159	ENSG00000138100	TRIM54	E3	RING	E3_RING	-0.217987	-3.47568	3.85e-68	7.15e-73
6049	ENSG00000127870	RNF6	E3	RING	E3_RING	-0.209728	0.4102	9.73e-302	0
23355	ENSG00000156931	VPS8	E3	RING	E3_RING	-0.207042	-0.22409	3.55e-220	6.59e-225
26994	ENSG00000123091	RNF11	E3	RING	E3_RING	-0.204832	-0.216669	7.31e-114	1.36e-118
344558	ENSG00000172985	SH3RF3	E3	RING	E3_RING	-0.200586	-0.490495	9.73e-302	0
359948	ENSG00000168264	IRF2BP2	E3	RING	E3_RING	-0.198086	0.724236	9.73e-302	0
10299	ENSG00000145495	MARCHF6	E3	RING	E3_RING	-0.195699	0.113459	0.0110124	2.04e-07
267	ENSG00000159461	AMFR	E3	RING	E3_RING	-0.194369	0.558631	9.73e-302	0
9169	ENSG00000139218	SCAF11	E3	RING	E3_RING	-0.193822	0.142193	2.24e-18	4.15e-23
153769	ENSG00000156463	SH3RF2	E3	RING	E3_RING	-0.192883	-1.28773	5.05e-23	9.38e-28
84767	ENSG00000233198	RNF224	E3	RING	E3_RING	-0.192512	-0.358865	4.09e-29	7.59e-34
84231	ENSG00000131653	TRAF7	E3	RING	E3_RING	-0.191049	0.779933	9.73e-302	0
149041	ENSG00000135870	RC3H1	E3	RING	E3_RING	-0.184571	-0.153605	1.38e-225	2.56e-230
5192	ENSG00000157911	PEX10	E3	RING	E3_RING	-0.182374	0.846696	9.73e-302	0
196403	ENSG00000178498	DTX3	E3	RING	E3_RING	-0.182005	-0.783234	9.73e-302	0
80263	ENSG00000134253	TRIM45	E3	RING	E3_RING	-0.179563	-0.403223	6.51e-130	1.21e-134
23113	ENSG00000112659	CUL9	E3	RING	E3_RING	-0.17745	-0.121454	1.62e-62	3.01e-67
11236	ENSG00000291729	RNF139	E3	RING	E3_RING	-0.176438	0.575695	9.73e-302	0
55072	ENSG00000092098	RNF31	E3	RING	E3_RING	-0.175693	-1.22105	9.73e-302	0
84900	ENSG00000135119	RNFT2	E3	RING	E3_RING	-0.173531	0.67482	9.73e-302	0
79102	ENSG00000173456	RNF26	E3	RING	E3_RING	-0.163153	1.04856	9.73e-302	0
51127	ENSG00000162931	TRIM17	E3	RING	E3_RING	-0.152795	-0.558379	1	0.0109613
9870	ENSG00000119682	AREL1	E3	RING	E3_RING	-0.15145	0.229268	3.53e-206	6.55e-211
55823	ENSG00000272186	VPS11	E3	RING	E3_RING	-0.149419	-0.233528	1.64e-141	3.05e-146
6048	ENSG00000204308	RNF5	E3	RING	E3_RING	-0.147281	0.665033	9.73e-302	0
84206	ENSG00000183496	MEX3B	E3	RING	E3_RING	-0.143108	-0.358292	7.8e-18	1.45e-22
26145	ENSG00000170604	IRF2BP1	E3	RING	E3_RING	-0.142757	0.546513	9.73e-302	0
51444	ENSG00000134758	RNF138	E3	RING	E3_RING	-0.140375	0.430229	9.73e-302	0
149095	ENSG00000163357	DCST1	E3	RING	E3_RING	-0.137011	-0.49113	3.34e-134	6.19e-139
57574	ENSG00000144583	MARCHF4	E3	RING	E3_RING	-0.13625	-0.225942	6.91e-180	1.28e-184
80352	ENSG00000204618	RNF39	E3	RING	E3_RING	-0.135293	-0.791649	9.73e-302	0
142678	ENSG00000197530	MIB2	E3	RING	E3_RING	-0.129136	-0.840661	9.73e-302	0
257160	ENSG00000167257	RNF214	E3	RING	E3_RING	-0.120734	-0.165818	7.98e-118	1.48e-122
7189	ENSG00000175104	TRAF6	E3	RING	E3_RING	-0.118866	-0.200932	2.36e-211	4.38e-216
146310	ENSG00000179580	RNF151	E3	RING	E3_RING	-0.117648	-4.87567	1	0.00084318
84767	ENSG00000237330	RNF223	E3	RING	E3_RING	-0.113472	0.455703	1.46e-299	2.71e-304
84767	ENSG00000223417	TRIM49D1	E3	RING	E3_RING	-0.111283	0.393366	3.83e-269	7.11e-274
10107	ENSG00000204613	TRIM10	E3	RING	E3_RING	-0.109513	0.427936	6.54e-83	1.21e-87
378884	ENSG00000187566	NHLRC1	E3	RING	E3_RING	-0.109376	0.315743	1.56e-53	2.89e-58
254225	ENSG00000166439	RNF169	E3	RING	E3_RING	-0.108983	0.284248	2.55e-23	4.73e-28
27246	ENSG00000265491	RNF115	E3	RING	E3_RING	-0.103319	-0.248531	9.66e-58	1.79e-62
55167	ENSG00000174579	MSL2	E3	RING	E3_RING	-0.101067	0.368148	9.73e-302	0
7542	ENSG00000162300	ZFPL1	E3	RING	E3_RING	-0.100819	-1.48311	9.73e-302	0
201292	ENSG00000141569	TRIM65	E3	RING	E3_RING	-0.100373	0.257668	1.74e-180	3.22e-185
5828	ENSG00000164751	PEX2	E3	RING	E3_RING	-0.0989935	0.632956	9.73e-302	0
135892	ENSG00000146755	TRIM50	E3	RING	E3_RING	-0.0963399	-0.300739	9.33e-171	1.73e-175
54476	ENSG00000011275	RNF216	E3	RING	E3_RING	-0.0963153	0.490321	1.28e-05	2.37e-10
91107	ENSG00000132481	TRIM47	E3	RING	E3_RING	-0.0930381	0.762031	9.73e-302	0
373	ENSG00000113595	TRIM23	E3	RING	E3_RING	-0.0893955	-0.254608	5.01e-257	9.3e-262
131405	ENSG00000206557	TRIM71	E3	RING	E3_RING	-0.0875167	1.98475	1.78e-90	3.31e-95
4214	ENSG00000095015	MAP3K1	E3	RING	E3_RING	-0.0834995	0.628525	9.73e-302	0
51533	ENSG00000010318	PHF7	E3	RING	E3_RING	-0.0833483	-3.33274	6.99e-77	1.3e-81
56163	ENSG00000132972	RNF17	E3	RING	E3_RING	-0.0816144	-1.53425	5.03e-32	9.33e-37
93082	ENSG00000163121	NEURL3	E3	RING	E3_RING	-0.079435	1.04228	9.73e-302	0
220441	ENSG00000176641	RNF152	E3	RING	E3_RING	-0.0788072	-0.466398	3.32e-217	6.16e-222
5896	ENSG00000166349	RAG1	E3	RING	E3_RING	-0.07565	2.59164	9.73e-302	0
84759	ENSG00000115289	PCGF1	E3	RING	E3_RING	-0.0730278	0.754303	9.73e-302	0
64207	ENSG00000119669	IRF2BPL	E3	RING	E3_RING	-0.0729181	0.204643	2.61e-24	4.85e-29
80196	ENSG00000170633	RNF34	E3	RING	E3_RING	-0.0704156	0.507449	9.73e-302	0
283514	ENSG00000215475	SIAH3	E3	RING	E3_RING	-0.0701051	-0.280399	1	0.0157838
55743	ENSG00000072609	CHFR	E3	RING	E3_RING	-0.0683024	-0.256558	2.12e-260	3.94e-265
442247	ENSG00000251258	RFPL4B	E3	RING	E3_RING	-0.064428	0.57546	3.22e-197	5.98e-202
23295	ENSG00000102858	MGRN1	E3	RING	E3_RING	-0.0618844	0.192281	1.12e-120	2.07e-125
90933	ENSG00000146063	TRIM41	E3	RING	E3_RING	-0.0607223	-0.275558	2.42e-133	4.49e-138
54467	ENSG00000001629	ANKIB1	E3	RING	E3_RING	-0.0599676	0.538824	9.73e-302	0
51283	ENSG00000103429	BFAR	E3	RING	E3_RING	-0.0575108	0.755505	9.73e-302	0
55298	ENSG00000137522	RNF121	E3	RING	E3_RING	-0.0537328	0.554221	9.73e-302	0
493829	ENSG00000177238	TRIM72	E3	RING	E3_RING	-0.0532138	-2.3504	2.09e-258	3.88e-263
7706	ENSG00000121060	TRIM25	E3	RING	E3_RING	-0.0524718	-0.186981	4.51e-30	8.36e-35
84333	ENSG00000180628	PCGF5	E3	RING	E3_RING	-0.0523698	-0.298588	2.83e-230	5.25e-235
10336	ENSG00000185619	PCGF3	E3	RING	E3_RING	-0.0505312	-0.552951	9.73e-302	0
151525	ENSG00000196151	WDSUB1	E3	RING	E3_RING	-0.0499883	0.335746	1.14e-248	2.12e-253
6018	ENSG00000117000	RLF	E3	RING	E3_RING	-0.0497993	-0.332999	1.75e-243	3.24e-248
79169	ENSG00000143793	C1orf35	E3	RING	E3_RING	-0.0491131	0.271964	5.25e-152	9.74e-157
79594	ENSG00000090432	MUL1	E3	RING	E3_RING	-0.0490181	0.374671	9.73e-302	0
79589	ENSG00000133135	RNF128	E3	RING	E3_RING	-0.0489965	1.89419	9.73e-302	0
154214	ENSG00000146373	RNF217	E3	RING	E3_RING	-0.0482981	-0.811145	9.73e-302	0
56852	ENSG00000070950	RAD18	E3	RING	E3_RING	-0.0461281	0.768654	9.73e-302	0
25925	ENSG00000198795	ZNF521	E3	RING	E3_RING	-0.0456857	-0.614168	9.73e-302	0
285498	ENSG00000178222	RNF212	E3	RING	E3_RING	-0.0455566	0.499527	1.04e-256	1.94e-261
90678	ENSG00000148356	LRSAM1	E3	RING	E3_RING	-0.0444405	-0.181337	4.2e-64	7.8e-69
50626	ENSG00000187954	ZFTRAF1	E3	RING	E3_RING	-0.0411012	0.830509	9.73e-302	0
257218	ENSG00000146414	SHPRH	E3	RING	E3_RING	-0.0409308	-0.320083	9.73e-302	0
6045	ENSG00000121481	RNF2	E3	RING	E3_RING	-0.0405428	1.2309	9.73e-302	0
89122	ENSG00000146833	TRIM4	E3	RING	E3_RING	-0.0398795	0.219933	2.85e-75	5.28e-80
89970	ENSG00000159579	RSPRY1	E3	RING	E3_RING	-0.0382475	0.547525	9.73e-302	0
7681	ENSG00000179455	MKRN3	E3	RING	E3_RING	-0.0380176	1.02273	2.81e-42	5.21e-47
84282	ENSG00000291712	RNF135	E3	RING	E3_RING	-0.0369591	0.289145	1.67e-208	3.09e-213
51132	ENSG00000131263	RLIM	E3	RING	E3_RING	-0.036252	0.275286	2.81e-261	5.21e-266
81559	ENSG00000154370	TRIM11	E3	RING	E3_RING	-0.0356062	0.650335	9.73e-302	0
164832	ENSG00000170500	LONRF2	E3	RING	E3_RING	-0.0354501	-0.939846	9.73e-302	0
51136	ENSG00000189050	RNFT1	E3	RING	E3_RING	-0.0345336	0.163022	1.68e-157	3.12e-162
162333	ENSG00000173838	MARCHF10	E3	RING	E3_RING	-0.034469	-2.49226	1.66e-34	3.09e-39
331	ENSG00000101966	XIAP	E3	RING	E3_RING	-0.0341419	0.765253	9.73e-302	0
152006	ENSG00000137075	RNF38	E3	RING	E3_RING	-0.0339748	-0.237924	1.17e-105	2.18e-110
388591	ENSG00000158286	RNF207	E3	RING	E3_RING	-0.0321228	-0.701907	6.17e-241	1.15e-245
10475	ENSG00000112343	TRIM38	E3	RING	E3_RING	-0.0319902	0.216373	8.84e-37	1.64e-41
200312	ENSG00000099999	RNF215	E3	RING	E3_RING	-0.0308022	0.109699	7.29e-19	1.35e-23
55905	ENSG00000124226	RNF114	E3	RING	E3_RING	-0.0305001	0.632912	9.73e-302	0
115426	ENSG00000147854	UHRF2	E3	RING	E3_RING	-0.0296904	-0.379857	9.73e-302	0
643904	ENSG00000189051	RNF222	E3	RING	E3_RING	-0.0295261	-1.96788	1	0.000615551
127544	ENSG00000116514	RNF19B	E3	RING	E3_RING	-0.0294238	0.560177	9.73e-302	0
7187	ENSG00000131323	TRAF3	E3	RING	E3_RING	-0.0294179	0.266987	9.73e-302	0
7726	ENSG00000234127	TRIM26	E3	RING	E3_RING	-0.0257388	0.773145	9.73e-302	0
285671	ENSG00000164197	RNF180	E3	RING	E3_RING	-0.0254261	-0.247473	9.73e-302	0
10738	ENSG00000128276	RFPL3	E3	RING	E3_RING	-0.0250194	-0.136447	1.06e-174	1.96e-179
84851	ENSG00000183718	TRIM52	E3	RING	E3_RING	-0.0248696	-1.46607	9.73e-302	0
22838	ENSG00000146083	RNF44	E3	RING	E3_RING	-0.024851	0.240751	1.7e-121	3.16e-126
4850	ENSG00000080802	CNOT4	E3	RING	E3_RING	-0.023754	0.180606	8.31e-109	1.54e-113
22888	ENSG00000185019	UBOX5	E3	RING	E3_RING	-0.0223453	0.139015	1.47e-54	2.72e-59
79596	ENSG00000152193	OBI1	E3	RING	E3_RING	-0.0217191	0.602443	9.73e-302	0
6737	ENSG00000132109	TRIM21	E3	RING	E3_RING	-0.0212105	0.600549	9.73e-302	0
22954	ENSG00000119401	TRIM32	E3	RING	E3_RING	-0.0159269	0.400397	9.73e-302	0
5988	ENSG00000128250	RFPL1	E3	RING	E3_RING	-0.0152805	0.449382	9.73e-302	0
1840	ENSG00000135144	DTX1	E3	RING	E3_RING	-0.0144775	-0.683697	1.97e-214	3.66e-219
54492	ENSG00000214357	NEURL1B	E3	RING	E3_RING	-0.0126619	-0.28069	7.01e-46	1.3e-50
115123	ENSG00000173926	MARCHF3	E3	RING	E3_RING	-0.0120777	-0.283559	3.48e-109	6.46e-114
138065	ENSG00000165188	RNF183	E3	RING	E3_RING	-0.0117055	1.95339	1.1e-227	2.04e-232
23609	ENSG00000075975	MKRN2	E3	RING	E3_RING	-0.0110503	-0.10732	1.4e-33	2.6e-38
81790	ENSG00000120925	RNF170	E3	RING	E3_RING	-0.00868385	0.284462	9.68e-200	1.8e-204
58508	ENSG00000055609	KMT2C	E3	RING	E3_RING	-0.00847252	-0.178609	2.2e-263	4.09e-268
92305	ENSG00000168936	TMEM129	E3	RING	E3_RING	-0.00829928	0.191551	5.61e-26	1.04e-30
51320	ENSG00000176624	MEX3C	E3	RING	E3_RING	-0.00638692	0.47151	9.73e-302	0
84675	ENSG00000147573	TRIM55	E3	RING	E3_RING	-0.00594622	-0.438928	1	0.000908103
79836	ENSG00000175556	LONRF3	E3	RING	E3_RING	-0.0048835	-0.475204	1.8e-206	3.35e-211
56658	ENSG00000204599	TRIM39	E3	RING	E3_RING	-0.00313357	-0.732835	9.73e-302	0
84708	ENSG00000072201	LNX1	E3	RING	E3_RING	-0.00251261	0.418073	3.29e-192	6.11e-197
220972	ENSG00000165406	MARCHF8	E3	RING	E3_RING	-0.00217682	-0.138292	1.9e-38	3.52e-43
81603	ENSG00000171206	TRIM8	E3	RING	E3_RING	-0.00178437	0.366813	1.41e-45	2.61e-50
868	ENSG00000114423	CBLB	E3	RING	E3_RING	-0.00167681	-0.419367	3.03e-130	5.62e-135
390231	ENSG00000214414	TRIM77	E3	RING	E3_RING	-0.00139223	0.440789	9.73e-302	1.81e-306
140432	ENSG00000139797	RNF113B	E3	RING	E3_RING	-0.00130298	-3.46436	3.42e-86	6.35e-91
158506	ENSG00000175809	CBLL2	E3	RING	E3_RING	0.00112393	-2.36758	1.57e-132	2.92e-137
29951	ENSG00000165966	PDZRN4	E3	RING	E3_RING	0.00132905	-2.08388	9.73e-302	0
5987	ENSG00000204713	TRIM27	E3	RING	E3_RING	0.00184267	0.555219	9.73e-302	0
5913	ENSG00000165917	RAPSN	E3	RING	E3_RING	0.00265474	-1.45195	3.65e-291	6.76e-296
55182	ENSG00000187147	RNF220	E3	RING	E3_RING	0.00400053	0.11317	1.54e-108	2.86e-113
867	ENSG00000110395	CBL	E3	RING	E3_RING	0.00506864	-0.180915	1.43e-76	2.66e-81
23220	ENSG00000110042	DTX4	E3	RING	E3_RING	0.00657918	0.777103	8.7e-143	1.61e-147
23024	ENSG00000121440	PDZRN3	E3	RING	E3_RING	0.00743576	-1.09542	9.73e-302	0
10739	ENSG00000128253	RFPL2	E3	RING	E3_RING	0.0082394	-0.126255	4.01e-55	7.44e-60
5193	ENSG00000108733	PEX12	E3	RING	E3_RING	0.00829908	0.580575	9.73e-302	0
9867	ENSG00000198961	PJA2	E3	RING	E3_RING	0.00964357	-0.276842	2.41e-219	4.47e-224
223082	ENSG00000180233	ZNRF2	E3	RING	E3_RING	0.0120041	0.870274	9.73e-302	0
11342	ENSG00000082996	RNF13	E3	RING	E3_RING	0.0122181	0.213024	1.92e-181	3.57e-186
9921	ENSG00000022840	RNF10	E3	RING	E3_RING	0.0123282	-0.245503	6.43e-47	1.19e-51
140691	ENSG00000185880	TRIM69	E3	RING	E3_RING	0.0128727	0.52035	9.73e-302	0
54542	ENSG00000056586	RC3H2	E3	RING	E3_RING	0.0130184	0.156239	1.26e-11	2.33e-16
89870	ENSG00000235905	TRIM15	E3	RING	E3_RING	0.0145013	2.059	9.73e-302	0
5325	ENSG00000118495	PLAGL1	E3	RING	E3_RING	0.0145825	-1.57216	9.73e-302	0
64718	ENSG00000059145	UNKL	E3	RING	E3_RING	0.0165925	-0.727387	9.73e-302	0
84767	ENSG00000182053	TRIM49B	E3	RING	E3_RING	0.0172587	0.848052	9.73e-302	0
440730	ENSG00000119283	TRIM67	E3	RING	E3_RING	0.0174438	0.676868	0.22814	4.23e-06
151636	ENSG00000163840	DTX3L	E3	RING	E3_RING	0.0185774	1.39701	9.73e-302	0
55521	ENSG00000152503	TRIM36	E3	RING	E3_RING	0.0186829	-0.551489	2.39e-171	4.43e-176
9148	ENSG00000107954	NEURL1	E3	RING	E3_RING	0.0187709	-1.45859	3.81e-101	7.07e-106
10210	ENSG00000197579	TOPORS	E3	RING	E3_RING	0.0192456	0.267912	3.93e-269	7.3e-274
2122	ENSG00000085276	MECOM	E3	RING	E3_RING	0.0200671	0.837473	1.03e-55	1.91e-60
84905	ENSG00000131061	ZNF341	E3	RING	E3_RING	0.0204332	0.199645	2.14e-100	3.96e-105
9666	ENSG00000198919	DZIP3	E3	RING	E3_RING	0.0219997	-0.271102	6.65e-24	1.23e-28
10206	ENSG00000204977	TRIM13	E3	RING	E3_RING	0.023191	0.100794	3.33e-53	6.17e-58
168433	ENSG00000188050	RNF133	E3	RING	E3_RING	0.0236572	-3.41488	7.13e-204	1.32e-208
10346	ENSG00000132274	TRIM22	E3	RING	E3_RING	0.0245096	-0.237067	0.0367251	6.81e-07
84133	ENSG00000183579	ZNRF3	E3	RING	E3_RING	0.0252857	-5.28525	9.73e-302	0
9616	ENSG00000114125	RNF7	E3	RING	E3_RING	0.0254014	0.527113	9.73e-302	0
81847	ENSG00000118518	RNF146	E3	RING	E3_RING	0.0261882	-0.705139	9.73e-302	0
221687	ENSG00000180537	RNF182	E3	RING	E3_RING	0.0273643	0.291506	1.66e-20	3.08e-25
6477	ENSG00000196470	SIAH1	E3	RING	E3_RING	0.0279415	0.501941	9.73e-302	0
114804	ENSG00000141576	RNF157	E3	RING	E3_RING	0.0295784	-0.533815	1.84e-15	3.42e-20
79097	ENSG00000150244	TRIM48	E3	RING	E3_RING	0.0315148	3.18553	9.73e-302	0
79364	ENSG00000070476	ZXDC	E3	RING	E3_RING	0.0327551	0.327007	5.42e-274	1e-278
151112	ENSG00000163012	ZSWIM2	E3	RING	E3_RING	0.0330001	-1.9817	1	0.242109
7267	ENSG00000182670	TTC3	E3	RING	E3_RING	0.0373392	0.233031	2.15e-57	3.98e-62
85363	ENSG00000132256	TRIM5	E3	RING	E3_RING	0.0374144	0.39965	9.73e-302	0
55223	ENSG00000116525	TRIM62	E3	RING	E3_RING	0.0374609	0.105717	1.13e-12	2.1e-17
6478	ENSG00000181788	SIAH2	E3	RING	E3_RING	0.0394816	0.687952	9.73e-302	0
57484	ENSG00000170153	RNF150	E3	RING	E3_RING	0.0402202	-0.767374	9.73e-302	0
727800	ENSG00000212864	RNF208	E3	RING	E3_RING	0.040227	-0.224915	6.47e-07	1.2e-11
64219	ENSG00000181191	PJA1	E3	RING	E3_RING	0.0412291	0.262594	2.93e-117	5.44e-122
84676	ENSG00000158022	TRIM63	E3	RING	E3_RING	0.0441448	-3.54948	9.73e-302	0
148066	ENSG00000105428	ZNRF4	E3	RING	E3_RING	0.0441554	-5.72779	1.77e-37	3.28e-42
5371	ENSG00000140464	PML	E3	RING	E3_RING	0.0459679	0.272721	1.52e-119	2.81e-124
57674	ENSG00000173821	RNF213	E3	RING	E3_RING	0.0477612	0.564761	9.73e-302	0
23321	ENSG00000109654	TRIM2	E3	RING	E3_RING	0.0484163	0.465195	3.15e-151	5.84e-156
51257	ENSG00000099785	MARCHF2	E3	RING	E3_RING	0.0491013	-0.504957	9.73e-302	0
117854	ENSG00000121236	TRIM6	E3	RING	E3_RING	0.0494218	0.179768	0.000495921	9.2e-09
330	ENSG00000023445	BIRC3	E3	RING	E3_RING	0.0507891	0.840209	7.6e-154	1.41e-158
378925	ENSG00000235631	RNF148	E3	RING	E3_RING	0.0536119	-3.01805	4.08e-32	7.58e-37
285533	ENSG00000145428	RNF175	E3	RING	E3_RING	0.0581176	-0.739253	5.65e-82	1.05e-86
54546	ENSG00000178828	RNF186	E3	RING	E3_RING	0.058911	1.89057	9.73e-302	0
11074	ENSG00000204616	TRIM31	E3	RING	E3_RING	0.0591415	2.64615	9.73e-302	0
7188	ENSG00000082512	TRAF5	E3	RING	E3_RING	0.061162	-0.635628	1.63e-175	3.03e-180
255488	ENSG00000137393	RNF144B	E3	RING	E3_RING	0.0613703	0.316926	2.08e-80	3.87e-85
26001	ENSG00000108523	RNF167	E3	RING	E3_RING	0.0620041	0.275086	9.73e-302	0
5071	ENSG00000185345	PRKN	E3	RING	E3_RING	0.0640519	-0.719758	9.73e-302	0
8805	ENSG00000122779	TRIM24	E3	RING	E3_RING	0.0657209	1.02462	9.73e-302	0
140545	ENSG00000105982	RNF32	E3	RING	E3_RING	0.0663217	0.156086	9.73e-302	0
54894	ENSG00000108375	RNF43	E3	RING	E3_RING	0.0671316	2.10197	9.73e-302	0
166655	ENSG00000176979	TRIM60	E3	RING	E3_RING	0.0689032	1.1721	7.43e-270	1.38e-274
441061	ENSG00000183654	MARCHF11	E3	RING	E3_RING	0.069233	-1.9136	1	0.312236
10616	ENSG00000125826	RBCK1	E3	RING	E3_RING	0.0694875	0.300773	1.1e-265	2.05e-270
287015	ENSG00000155890	TRIM42	E3	RING	E3_RING	0.0759056	-3.84607	1.14e-24	2.11e-29
222484	ENSG00000139517	LNX2	E3	RING	E3_RING	0.080385	0.746048	9.73e-302	0
25893	ENSG00000162722	TRIM58	E3	RING	E3_RING	0.0820742	-0.427154	1.06e-31	1.97e-36
339976	ENSG00000184108	TRIML1	E3	RING	E3_RING	0.0843129	-2.38267	9.73e-302	0
115992	ENSG00000158717	RNF166	E3	RING	E3_RING	0.0880665	-0.680786	3.22e-188	5.97e-193
153830	ENSG00000145860	RNF145	E3	RING	E3_RING	0.090321	0.31748	1.1e-95	2.04e-100
57630	ENSG00000154447	SH3RF1	E3	RING	E3_RING	0.0919746	0.666226	1.14e-278	2.12e-283
10612	ENSG00000110171	TRIM3	E3	RING	E3_RING	0.0935783	-0.87749	9.73e-302	0
9354	ENSG00000110344	UBE4A	E3	RING	E3_RING	0.0979603	0.212111	6.23e-46	1.16e-50
152518	ENSG00000170448	NFXL1	E3	RING	E3_RING	0.0985623	0.203765	1.44e-151	2.67e-156
84937	ENSG00000186187	ZNRF1	E3	RING	E3_RING	0.098872	0.53042	9.73e-302	0
23087	ENSG00000104228	TRIM35	E3	RING	E3_RING	0.100464	-0.188022	4.74e-31	8.8e-36
399664	ENSG00000181588	MEX3D	E3	RING	E3_RING	0.10262	0.762077	9.73e-302	0
79845	ENSG00000133874	RNF122	E3	RING	E3_RING	0.113342	-0.563106	3.46e-61	6.41e-66
6596	ENSG00000071794	HLTF	E3	RING	E3_RING	0.115349	0.66657	9.73e-302	0
286827	ENSG00000213186	TRIM59	E3	RING	E3_RING	0.118795	1.08958	9.73e-302	0
79444	ENSG00000101197	BIRC7	E3	RING	E3_RING	0.125787	2.55127	9.73e-302	0
55128	ENSG00000167333	TRIM68	E3	RING	E3_RING	0.126228	0.239755	1.85e-05	3.44e-10
81786	ENSG00000146054	TRIM7	E3	RING	E3_RING	0.126505	-1.26625	9.73e-302	0
91694	ENSG00000154359	LONRF1	E3	RING	E3_RING	0.126627	-0.998128	9.73e-302	0
84767	ENSG00000214891	TRIM64C	E3	RING	E3_RING	0.129053	0.410345	1.07e-271	1.98e-276
53840	ENSG00000258659	TRIM34	E3	RING	E3_RING	0.149835	-3.65236	9.73e-302	0
149603	ENSG00000285426	RNF187	E3	RING	E3_RING	0.150784	0.674143	9.73e-302	0
4281	ENSG00000101871	MID1	E3	RING	E3_RING	0.164472	0.457194	1.6e-128	2.98e-133
9781	ENSG00000151692	RNF144A	E3	RING	E3_RING	0.170842	-0.136896	0.258695	4.8e-06
84767	ENSG00000269855	RNF225	E3	RING	E3_RING	0.174438	-0.896112	9.73e-302	0
7732	ENSG00000128482	RNF112	E3	RING	E3_RING	0.178879	-1.76122	9.73e-302	0
84767	ENSG00000124900	TRIM51	E3	RING	E3_RING	NA	3.25506	9.73e-302	0
112401	ENSG00000163098	BIRC8	E3	RING	E3_RING	NA	-2.65962	3.53e-86	6.54e-91
378108	ENSG00000155428	TRIM74	E3	RING	E3_RING	NA	-1.16758	9.73e-302	0
84767	ENSG00000178809	TRIM73	E3	RING	E3_RING	NA	-0.899268	9.73e-302	0
23077	ENSG00000005810	MYCBP2	E3	RING	E3_RING	NA	-0.523297	9.73e-302	0
120146	ENSG00000204450	TRIM64	E3	RING	E3_RING	NA	0.391174	2.92e-257	5.41e-262
342931	ENSG00000223638	RFPL4A	E3	RING	E3_RING	NA	0.397922	9.73e-302	0
84767	ENSG00000189253	TRIM64B	E3	RING	E3_RING	NA	0.516376	4.42e-255	8.21e-260
84767	ENSG00000229292	RFPL4AL1	E3	RING	E3_RING	NA	0.552629	9.73e-302	0
84767	ENSG00000204449	TRIM49C	E3	RING	E3_RING	NA	0.617895	9.73e-302	0
57093	ENSG00000168930	TRIM49	E3	RING	E3_RING	NA	0.806663	9.73e-302	0
90850	ENSG00000167962	ZNF598	E3	RING	E3_RING	NA	0.195452	5.1e-82	9.46e-87
391714	ENSG00000250374	TRIM75	E3	RING	E3_RING	NA	0.59968	5.46e-181	1.01e-185
84767	ENSG00000144010	TRIM43B	E3	RING	E3_RING	NA	0.921171	9.73e-302	0
494470	ENSG00000141622	ARK2C	E3	RING	E3_RING	NA	-0.261519	9.97e-78	1.85e-82
9618	ENSG00000076604	TRAF4	E3	RING	E3_RING	-0.200943	1.68456	9.73e-302	0
23624	ENSG00000142273	CBLC	E3	RING	E3_RING	-0.128136	1.70055	9.73e-302	0
205860	ENSG00000179046	TRIML2	E3	SPRY	E3_SPRY	0.0898471	2.57944	1.32e-294	2.44e-299
27339	ENSG00000110107	PRPF19	E3	UBOX	E3_UBOX	-2.40654	0.885685	9.73e-302	0
23759	ENSG00000100023	PPIL2	E3	UBOX	E3_UBOX	-1.05822	0.306395	9.73e-302	0
10273	ENSG00000103266	STUB1	E3	UBOX	E3_UBOX	-0.267762	0.443015	9.73e-302	0
51070	ENSG00000142546	NOSIP	E3	UBOX	E3_UBOX	-0.221522	0.59792	9.73e-302	0
27125	ENSG00000072364	AFF4	E3	UBOX	E3_UBOX	-0.0911109	0.410329	9.73e-302	0
23352	ENSG00000127481	UBR4	E3	UBR	E3_UBR	-1.15539	-0.465568	9.73e-302	0
23304	ENSG00000024048	UBR2	E3	UBR	E3_UBR	-0.170547	-0.188574	9.73e-302	0
130507	ENSG00000144357	UBR3	E3	UBR	E3_UBR	-0.0905881	-0.480761	9.73e-302	0
197131	ENSG00000159459	UBR1	E3	UBR	E3_UBR	-0.010389	-0.17937	3.18e-191	5.9e-196
55148	ENSG00000012963	UBR7	E3	UBR	E3_UBR	0.0248382	0.442538	9.73e-302	0
80829	ENSG00000186660	ZFP91	E3	zf-C2H2	E3_zf-C2H2	-0.107701	-0.253063	2.37e-231	4.4e-236
